# Supplementary material for: Microwave-assisted synthesis of 4-amino pyrimidine analogues using eco-friendly NiTiO3 nanoparticle supported montmorillonite K30 as a heterogeneous catalyst
Source: Royal Society of Chemistry journal article supplement (doi:10.1039/d4nj02235a), 2024-01-01
Supplement: d4nj02235a1.pdf [file d4nj02235a1.pdf]

## Microwave-Assisted Synthesis of 4-Amino Pyrimidine Analogues Using Eco-Friendly NiTiO<sub>3</sub> Nanoparticles Supported Montmorillonite K30 as heterogeneous catalyst

Periasamy Vinoth Kumar,<sup>a</sup> Gunabalan Madhumitha<sup>a\*</sup>

Chemistry of Heterocycles & Natural Product Research Laboratory, Department of Chemistry,  
School of Advanced Sciences, Vellore Institute of Technology, Vellore 632 014, India

\* Corresponding author E-mail address: [dr.g.madhumitha@gmail.com](mailto:dr.g.madhumitha@gmail.com)

---

### Text S1. Materials

The commercial MK30 nano clay, Titanium Butoxide-Ti(C<sub>4</sub>H<sub>9</sub>O)<sub>4</sub>, Nickel acetate (CH<sub>3</sub>COO)<sub>2</sub>Ni were purchased from Sigma-Aldrich. Acetamidine-hydrochloride was purchased from the BLD pharm India Pvt Ltd. All other chemicals used in this work such as aldehydes, Dicyanomethane, ethanol and other solvents were purchased from Avra synthesis Pvt. Ltd in India. All reagents used were of analytical grade (AR) and used without further purification, and deionized water was made in our lab.

### Text S2. Characterization

The structure nature and crystallinity of the synthesized catalyst was examined by x-ray diffraction analysis (XRD, Bruker, Germany) with an angle range 5 to 90°. The functional group present in the synthesized composite as well as functional group present in the synthesized organic compound was analyzed by Fourier-transformed infrared spectroscopy via ATR mode. Morphology of the synthesized composite was identified by Field Emission Scanning Electron microscope (Thermo-Fisher FEI QUANTA 250 FEG) and TEM (FEI – TECNAI G2 – 20 TWIN) analysis. Surface area of the synthesized composite was calculated by Brunauer-Emmett-Teller technique (Quanta-chrome- instrument). The stability of the composite was encountered by using thermogravimetric analysis TA instruments, USA—SDT Q600. The XPS analysis used to examine the chemical state of the synthesized composite present on the surface (PHI 5000 Versa Probe III). To confirm the product formation of organic compounds, <sup>1</sup>H NMR and <sup>13</sup>C NMR (Bruker 400 MHz was used). The mass of formed product was calculated using HR-MS analysis (XEVO-G2-XS-QTOF) Waters, USA.

### Text S3. Quantification of Ni ions in the synthesized composite

Inductive coupled plasma resonance Mass spectrometry study used to measure the concentration of Ni ions Present in the synthesized NiTiO<sub>3</sub> and optimized M3NT20 composite. From the ICPMS analysis we obtained results for pristine NiTiO<sub>3</sub> out of 100% of Ni ions (300 ppb) we observed 91% of Ni ions (275 ppb). For composite 20%NiTiO<sub>3</sub>/MK30 composite out of 100% of Ni ions (55 ppb) we get the 90% (50 ppb). For the decreasing concentration of Ni ions in the composite shows little amount leaching of Ni ions present in the composite due to the over loading of NiTiO<sub>3</sub> on the surface of the MK30 clay. From, the ICPMS 20%NiTiO<sub>3</sub> loaded MK30 composite enough for carried out the reaction.

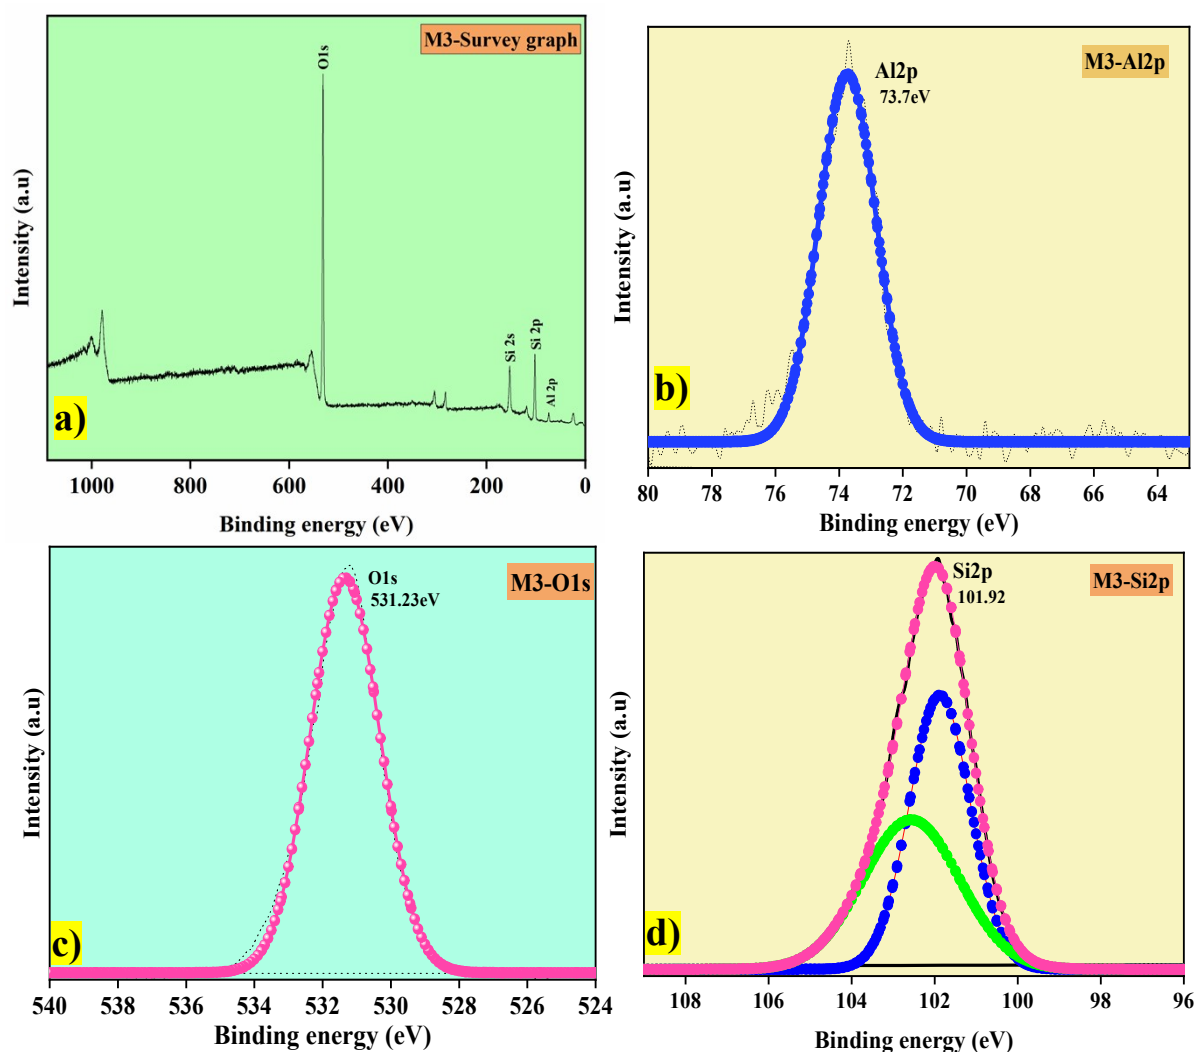

Fig. S1. (a-d) XPS data of MK30 clay

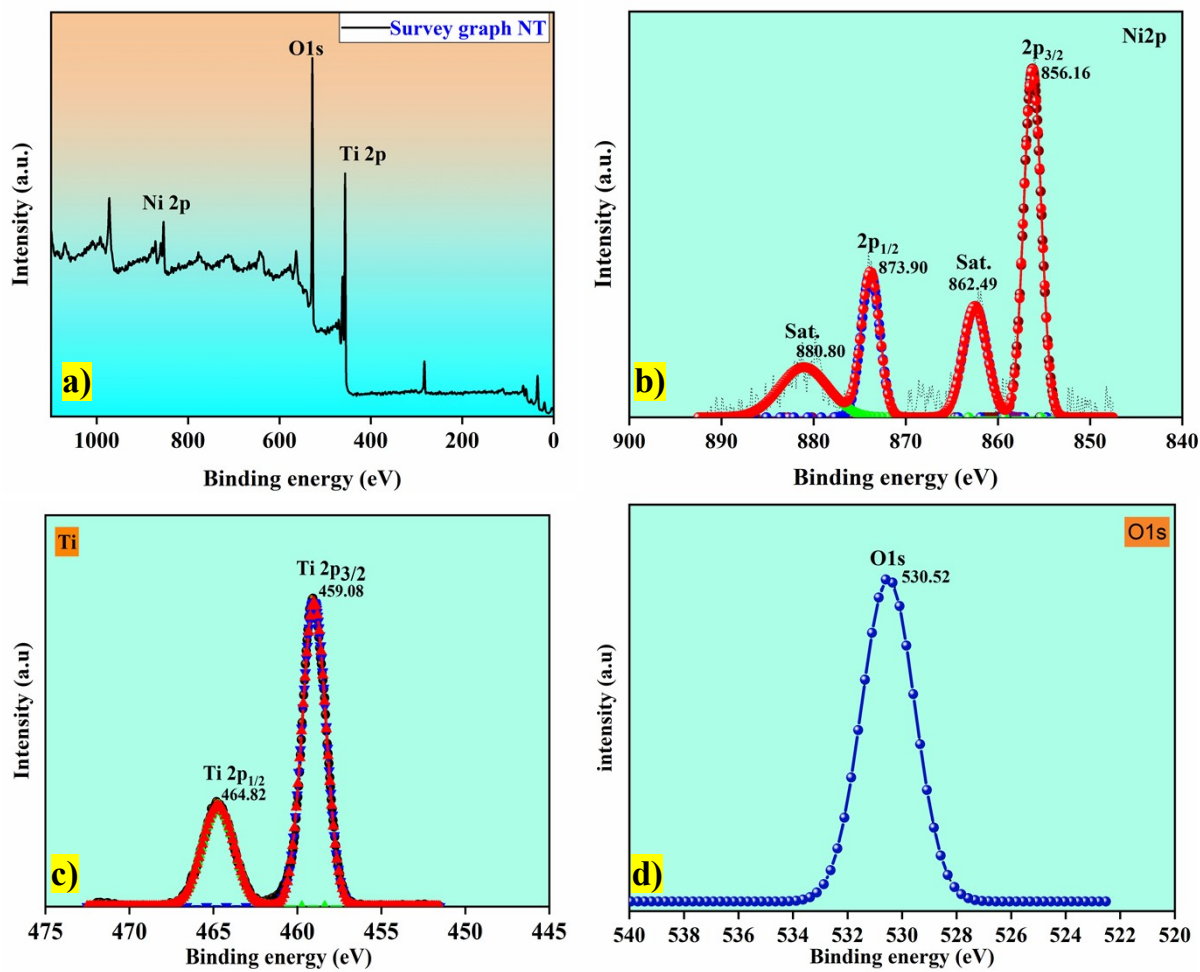

**Fig. S2.** ( a-d) XPS data of NiTiO<sub>3</sub>

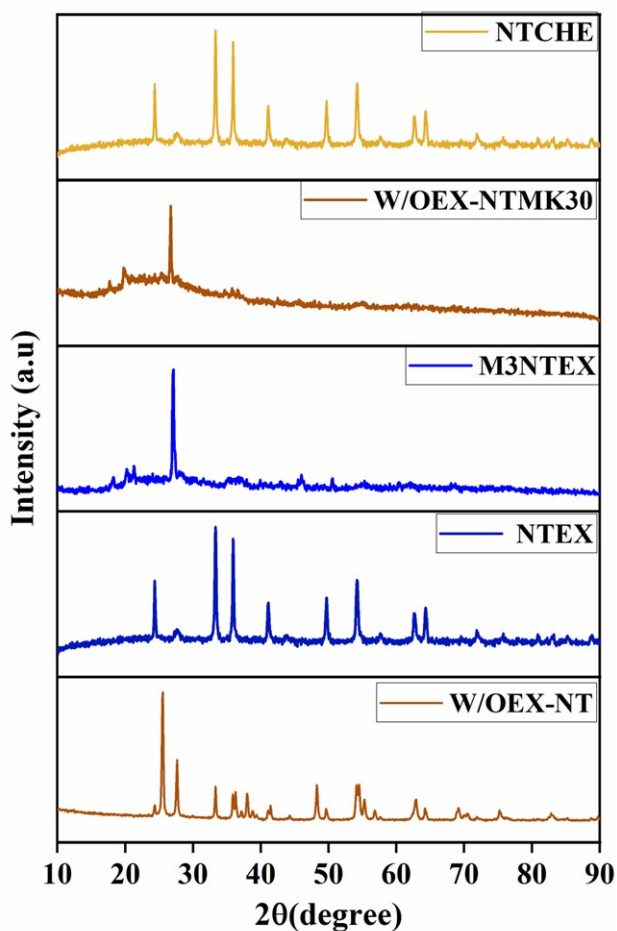

**Fig. S3.** Comparison XRD datas of NiTiO<sub>3</sub> without extract synthesis (W/OEX-NT), with extract (NTEX), chemical method (NTCHE), without extract composite (W/OEX-NTMK30), with extract composite (M3NTEX)

#### Characterization data of organic compounds

| S.No | Structure | Name and molecular formula                                                                                | Appearance & Melting point (°C) | FT-IR v/cm <sup>-1</sup> | HRMS     | <sup>1</sup> HNMR                                    | <sup>13</sup> C NMR                     |
|------|-----------|-----------------------------------------------------------------------------------------------------------|---------------------------------|--------------------------|----------|------------------------------------------------------|-----------------------------------------|
| 1.   |           | 4-amino-2-methyl-6-phenylpyrimidine-5-carbonitrile,<br><br>C <sub>12</sub> H <sub>10</sub> N <sub>4</sub> | White colour,<br>230°C          | 3379,<br>3134,<br>2216,  | 211.0943 | δ 5.6 (s, 2H), 7.4 (s, 3H), 7.9 (s, 2H), 2.5 (s, 3H) | δ 163.88, 131.59, 128.84, 128.74, 26.28 |

|    |                                                                                     |                                                                                       |                                   |                                           |          |                                                                          |                                                                                                                                                     |
|----|-------------------------------------------------------------------------------------|---------------------------------------------------------------------------------------|-----------------------------------|-------------------------------------------|----------|--------------------------------------------------------------------------|-----------------------------------------------------------------------------------------------------------------------------------------------------|
| 2. | 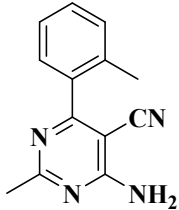   | 4-amino-2-methyl-6-(o-tolyl)pyrimidine-5-carbonitrile,<br><br>$C_{13}H_{12}N_4$       | Light yellow colour,<br><br>212°C | 3334,<br>3135,<br>2211,<br>573,           | 225.1016 | $\delta$ 5.6 (s, 2H), 7.2 (d, 2H), 7.3 (m, 2H), 2.5 (s, 2H), 2.2 (s, 3H) | $\delta$<br>171.13,<br>170.18,<br>163.54,<br>136.05,<br>135.72,<br>131.03,<br>130.11,<br>128.56,<br>126.03,<br>115.21,<br>87.75,<br>26.50,<br>19.59 |
| 3. |    | 4-amino-6-(2-chlorophenyl)-2-methylpyrimidine-5-carbonitrile,<br><br>$C_{12}H_9ClN_4$ | Light yellow colour,<br><br>225°C | 3382,<br>3122,<br>2213,<br>1681,          | 245.0598 | $\delta$ 5.6 (s, 2H), 7.2 (d, 2H), 7.4 (t, 3H), 2.5 (s, 3H)              | $\delta$<br>170.58,<br>168.19,<br>163.25,<br>131.34,<br>131.28,<br>130.06,<br>129.99,<br>127.95,<br>127.14,<br>114.71,<br>88.44,<br>26.49           |
| 4. |  | 4-amino-6-(3-bromophenyl)-2-methylpyrimidine-5-carbonitrile,<br><br>$C_{12}H_9BrN_4$  | Light yellow colour,<br><br>232°C | 3366,<br>3128,<br>2226,<br>1675,<br>1542, | 289.0089 | $\delta$ 5.6 (s, 2H), 7.3 (t, 1H), 7.6 (d, 1H), 7.8 (d, 1H), 8.0 (s, 1H) | $\delta$<br>169.67,<br>166.64,<br>164.61,<br>135.19,<br>131.72,<br>130.40,<br>125.41,<br>116.15,<br>84.40,<br>26.25                                 |

|    |                                                                                     |                                                                                          |                                   |                               |          |                                                                          |                                                                                                          |
|----|-------------------------------------------------------------------------------------|------------------------------------------------------------------------------------------|-----------------------------------|-------------------------------|----------|--------------------------------------------------------------------------|----------------------------------------------------------------------------------------------------------|
| 5. | 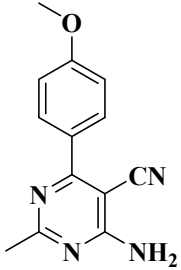   | 4-amino-6-(4-methoxyphenyl)-2-methylpyrimidine-5-carbonitrile,<br><br>$C_{13}H_{12}N_4O$ | Light yellow colour,<br><br>226°C | 3328, 3128, 2208, 1548,       | 241.1091 | $\delta$ 5.7 (s, 2H), 6.9 (d, 2H), 7.9 (d, 2H), 3.8 (s, 3H), 2.5 (s, 3H) | $\delta$<br>149.26, 148.76, 122.34, 119.20, 11.23, 117.23, 112.27, 111.68, 110.88, 83.26, 26.54, 22.13   |
| 6. |   | 4-amino-6-(4-chlorophenyl)-2-methylpyrimidine-5-carbonitrile,<br><br>$C_{12}H_9ClN_4$    | White colour,<br><br>236°C        | 3382, 3122, 2213, 1681, 1530  | 245.0598 | $\delta$ 5.8 (s, 2H), 7.4 (d, 2H), 7.8 (d, 2H), 2.5 (s, 3H)              | $\delta$<br>170.58, 168.19, 163.25, 131.34, 130.28, 130.06, 129.99, 127.95, 127.14, 114.71, 88.44, 26.49 |
| 7. |  | 4-amino-6-(4-fluorophenyl)-2-methylpyrimidine-5-carbonitrile,<br><br>$C_{12}H_9FN_4$     | White colour,<br><br>248°C        | 33370, 3146, 2213, 1669, 1548 | 229.0887 | $\delta$ 5.7 (s, 2H), 7.1 (t, 2H), 7.9 (q, 2H), 2.5 (s, 3H)              | $\delta$<br>169.69, 167.26, 164.72, 131.57, 131.48, 116.72, 116.06, 115.84, 84.02, 26.47                 |
| 8. |  | 4-amino-6-(4-bromophenyl)-2-methylpyrimidine-5-carbonitrile,<br><br>$C_{12}H_9BrN_4$     | White colour,<br><br>242°C        | 3377, 3140, 2213, 1675, 1548  | 289.0089 | $\delta$ 7.2 (s, 2H), 7.5 (d, 2H), 7.7 (d, 2H), 2.5 (s, 3H)              | $\delta$<br>169.67, 166.64, 164.61, 135.19, 131.72, 130.40,                                              |

|     |                                                                                     |                                                                                                |                                   |                                          |          |                                                                                                    |                                                                                                                                                                       |
|-----|-------------------------------------------------------------------------------------|------------------------------------------------------------------------------------------------|-----------------------------------|------------------------------------------|----------|----------------------------------------------------------------------------------------------------|-----------------------------------------------------------------------------------------------------------------------------------------------------------------------|
|     |                                                                                     | $C_{12}H_9BrN_4$                                                                               |                                   |                                          |          |                                                                                                    | 125.41,<br>116.15,<br>84.40,<br>26.25                                                                                                                                 |
| 9.  | 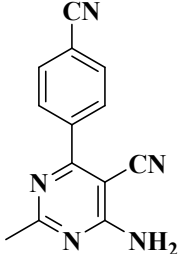   | 4-amino-6-(4-cyanophenyl)-2-methylpyrimidine-5-carbonitrile,<br><br>$C_{13}H_9N_5$             | Light yellow colour,<br><br>252°C | 3382,<br>3116,<br>2220,<br>1663,<br>1535 | 236.0938 | $\delta$ 6.0 (s, 2H), 7.7 (d, 2H), 8.0 (d, 2H), 2.6 (s, 3H)                                        | $\delta$<br>169.92,<br>164.52,<br>141.16,<br>132.92,<br>129.89,<br>116.26,<br>113.58,<br>84.75,<br>26.48                                                              |
| 10. |   | 4-amino-2-methyl-6-(naphthalen-1-yl)pyrimidine-5-carbonitrile,<br><br>$C_{16}H_{12}N_4$        | Light yellow colour,<br><br>190°C | 3377,<br>3164,<br>2159,<br>1602,         | 261.1146 | 5.9 (s, 2H), 7.5 (m, 3H), 7.90 (d, 1H), 7.99 (t, 1H), 8.2 (t, 1H), 8.7 (s, 1H)                     | $\delta$<br>160.71,<br>159.38,<br>130.73,<br>129.21,<br>128.99,<br>126.62,<br>126.56,<br>126.20,<br>126.02,<br>123.92,<br>53.39,<br>22.12                             |
| 11. |  | 4-amino-6-(3,4-dimethoxyphenyl)-2-methylpyrimidine-5-carbonitrile,<br><br>$C_{14}H_{14}N_4O_2$ | Light yellow colour,<br><br>222°C | 3370,<br>3134,<br>2213,<br>1675,<br>1221 | 271.1196 | $\delta$ 6.8 (s, 2H), 6.9 (d, 1H), 7.5 (d, 1H), 7.6 (d, 1H), 3.9 (d, 3H), 3.8 (d, 3H), 2.5 (s, 3H) | $\delta$<br>149.20,<br>148.76,<br>122.34,<br>119.20,<br>117.23,<br>112.27,<br>11.68,<br>110.88,<br>83.26,<br>56.12,<br>56.07,<br>56.03,<br>55.96,<br>53.68,<br>26.54, |

Signature SIF VIT VELLORE  
ACMBE

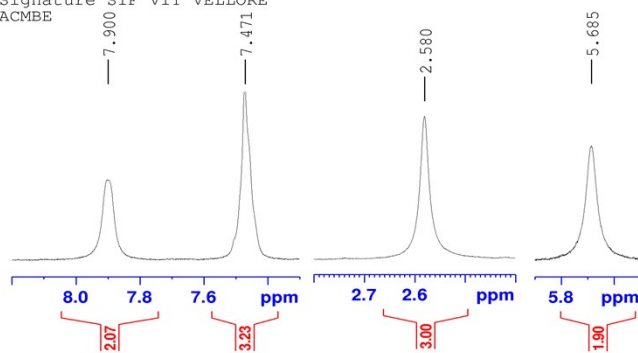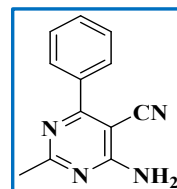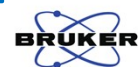

```
Current Data Parameters
NAME      Dr.MMG171123
EXPNO    5
PROCNO   1

F2 - Acquisition Parameters
Date_    20231117
Time     16.40 h
INSTRUM  spect
PROBHD   z108618_0005 (
PULPROG  zg30
TD        65536
SOLVENT  CDCl3
NS        32
DS        2
SWH       8012.820 Hz
FIDRES    0.244532 Hz
AQ         4.0894465 sec
RG         199.6
DW         62.400 usec
DE         6.50 usec
TE         300.2 K
D1         1.0000000 sec
TDO        1
SFO1      400.2604716 MHz
NUC1       1H
F1         15.00 usec
PLW1      15.21399975 W

F2 - Processing parameters
SI         80536
SF         400.2580365 MHz
WDW        EM
SSB        0
GB         0
LB         0.30 Hz
GB         0
PC         1.00
```

Figure S4. <sup>1</sup>H NMR spectrum of 2-methyl-6-phenyl-4-amino-5-carbonitrile (4a)



Signature SIF VIT VELLORE  
ACMBE

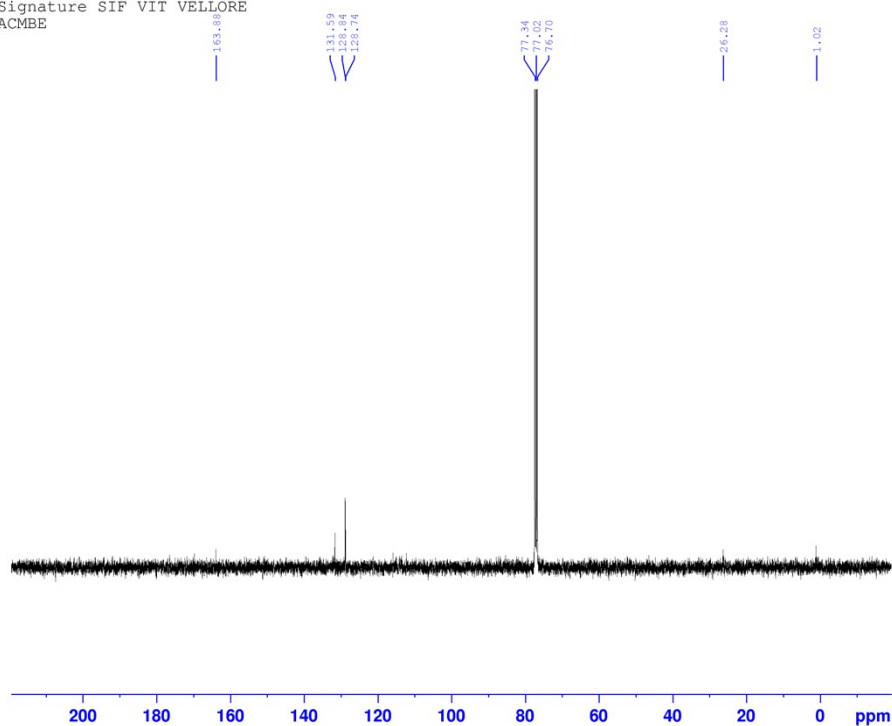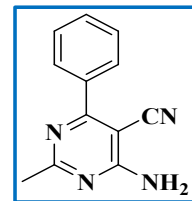

Figure S5.  $^{13}\text{C}$  NMR spectrum of 2-methyl-6-phenyl-4-amino-5-carbonitrile (4a)

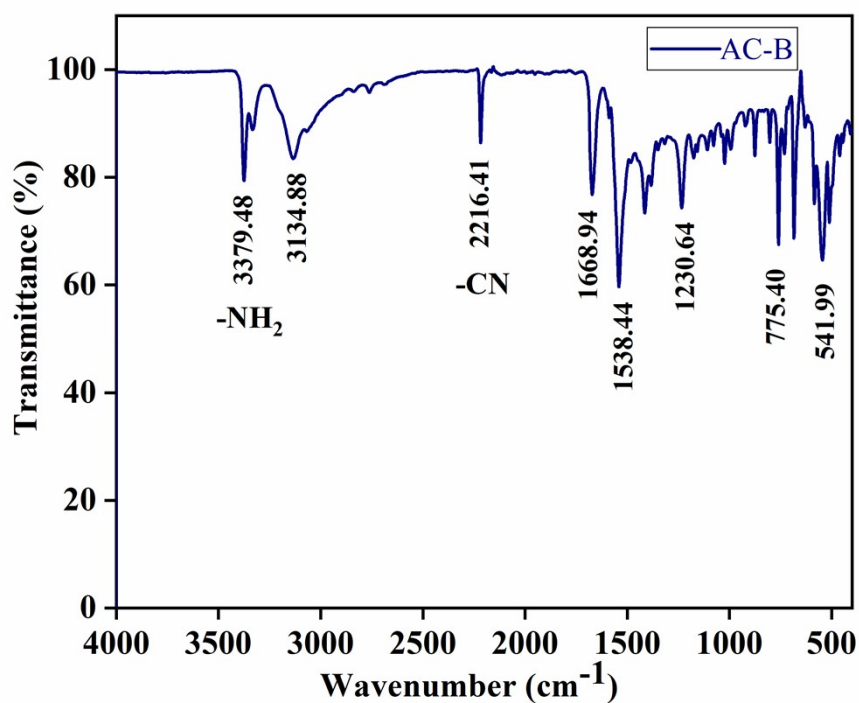

Figure S6. FT-IR spectrum of 2-methyl-6-phenyl-4-amino-5-carbonitrile (4a)

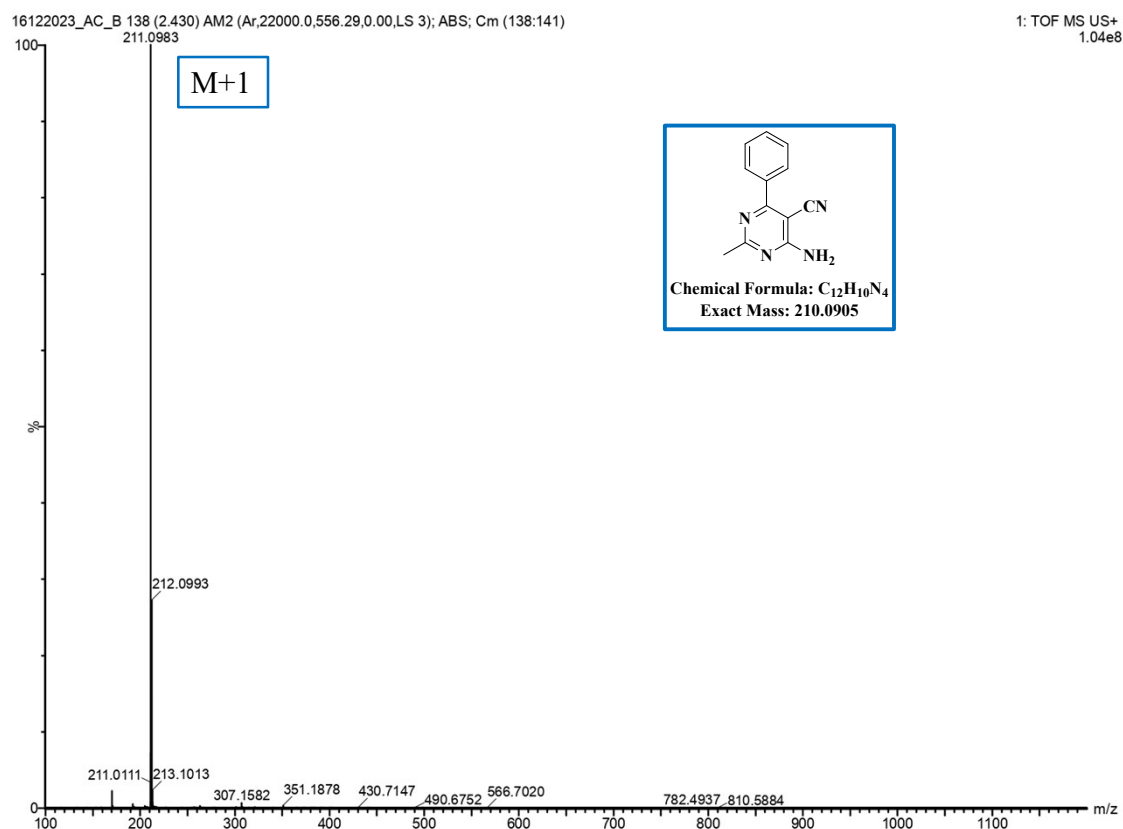

Figure S7. HR-MS spectrum of 2-methyl-6-phenyl-4-amino-5-carbonitrile (4a)

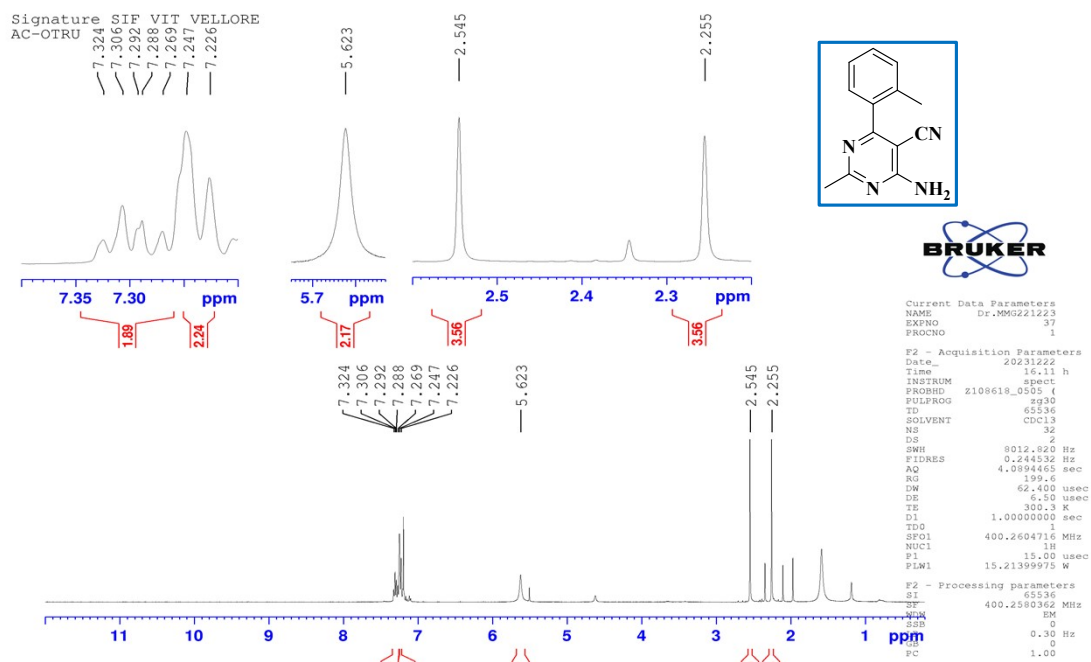

Figure S8.  $^1H$  NMR spectrum of 4-amino-2-methyl-6-(o-tolyl) pyrimidine-5-carbonitrile (4b)

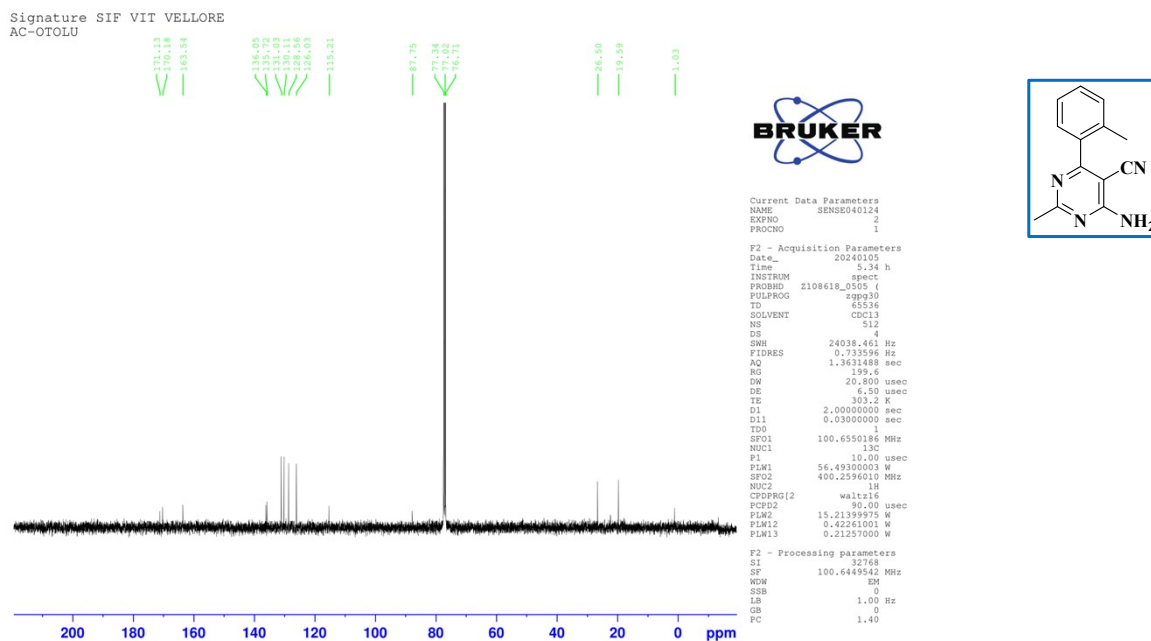

Figure S9.  $^{13}\text{C}$  NMR spectrum of 4-amino-2-methyl-6-(o-tolyl) pyrimidine-5-carbonitrile (4b)

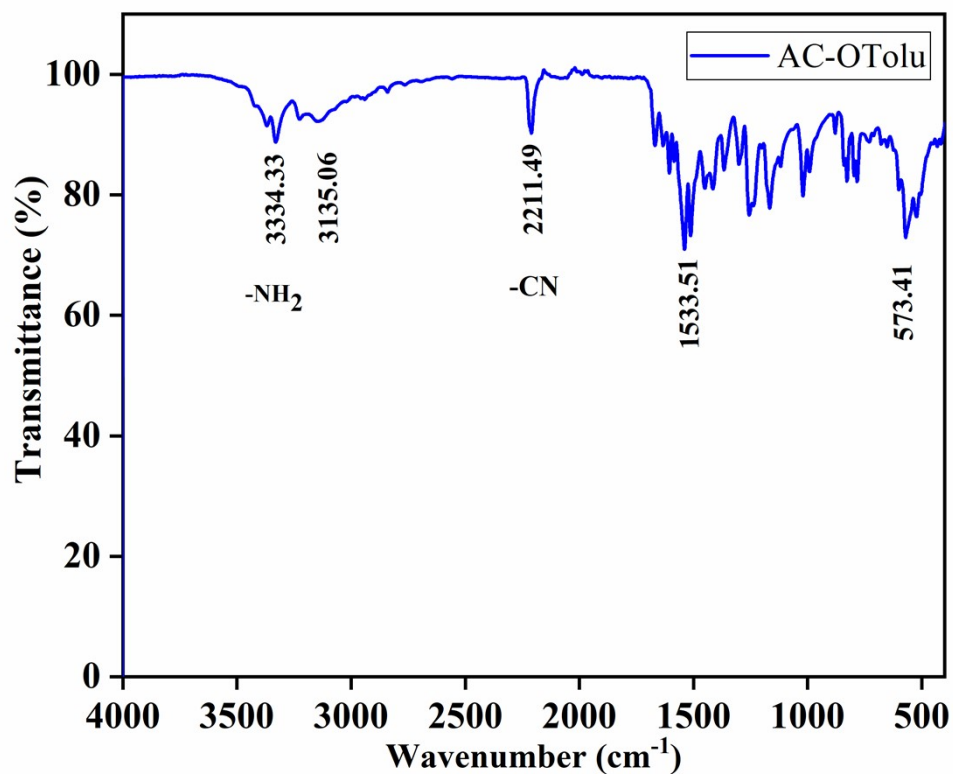

Figure S10. FT-IR spectrum of 4-amino-2-methyl-6-(o-tolyl) pyrimidine-5-carbonitrile (4b)

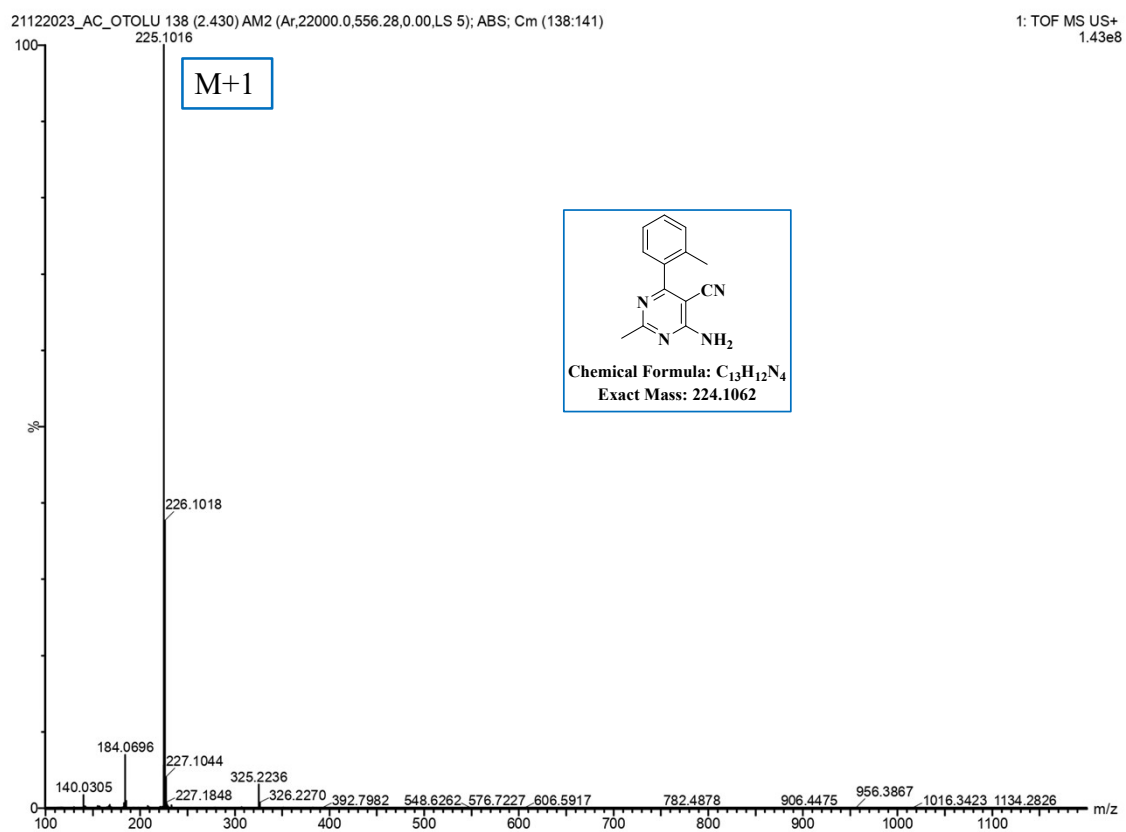

**Figure S11.** HR-MS spectrum of 4-amino-2-methyl-6-(o-tolyl) pyrimidine-5-carbonitrile (4b)

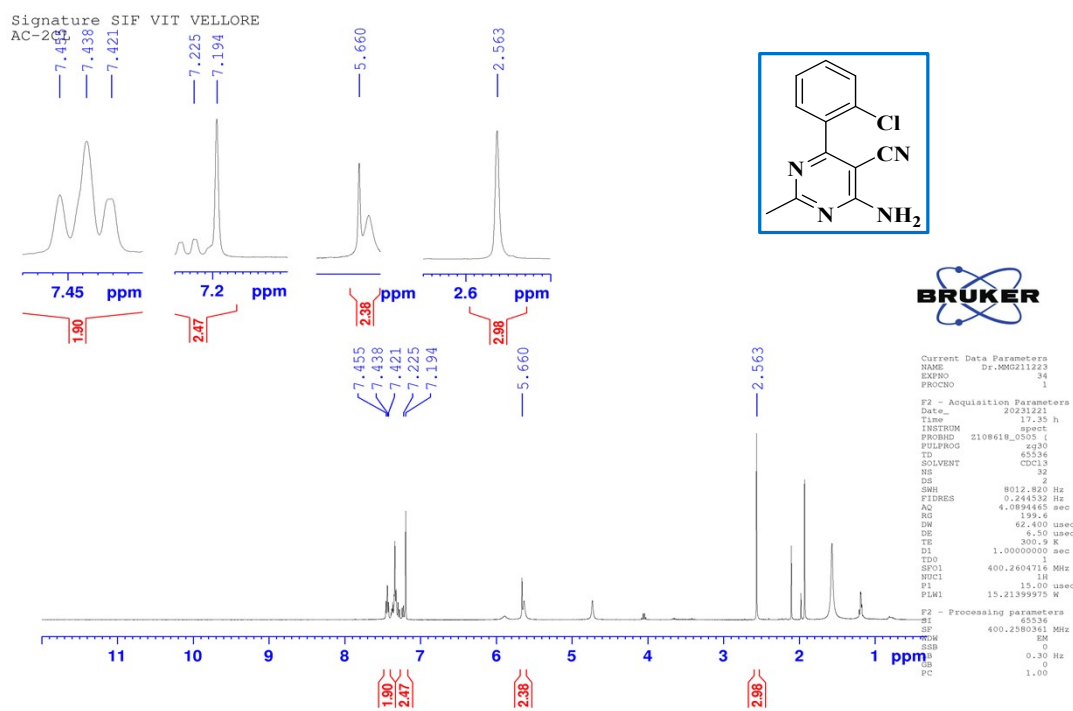

Figure S12. <sup>1</sup>H NMR spectrum of 4-amino-6-(2-chlorophenyl)-2-methylpyrimidine-5-carbonitrile (4C)

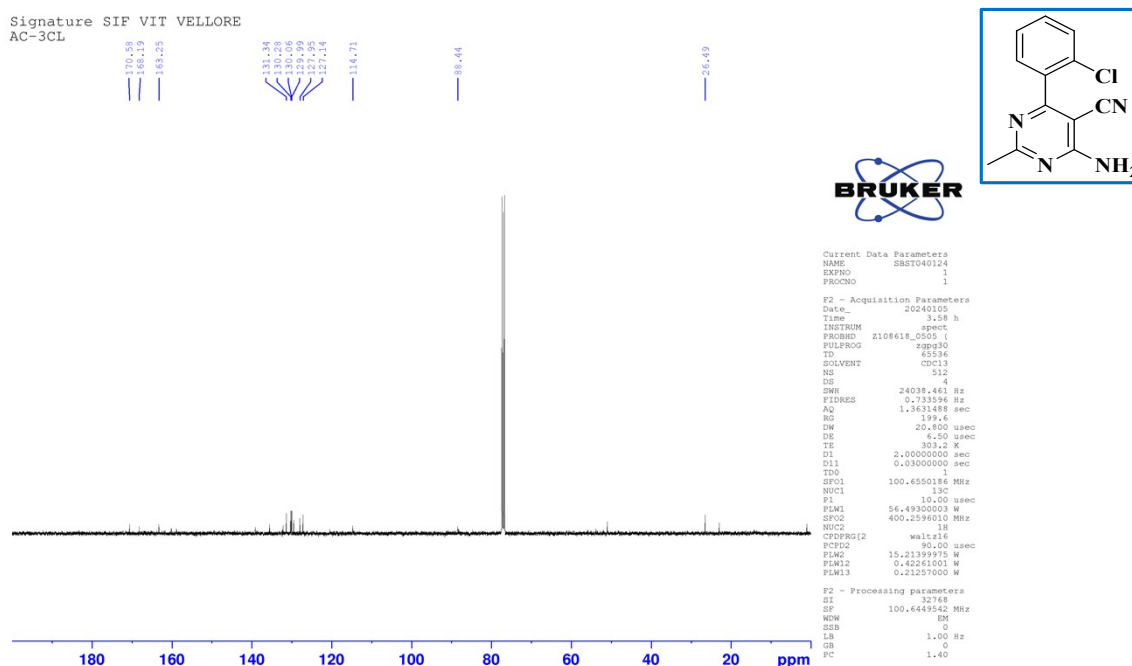

Figure S13. <sup>13</sup>C NMR spectrum of 4-amino-6-(2-chlorophenyl)-2-methylpyrimidine-5-carbonitrile (4C)

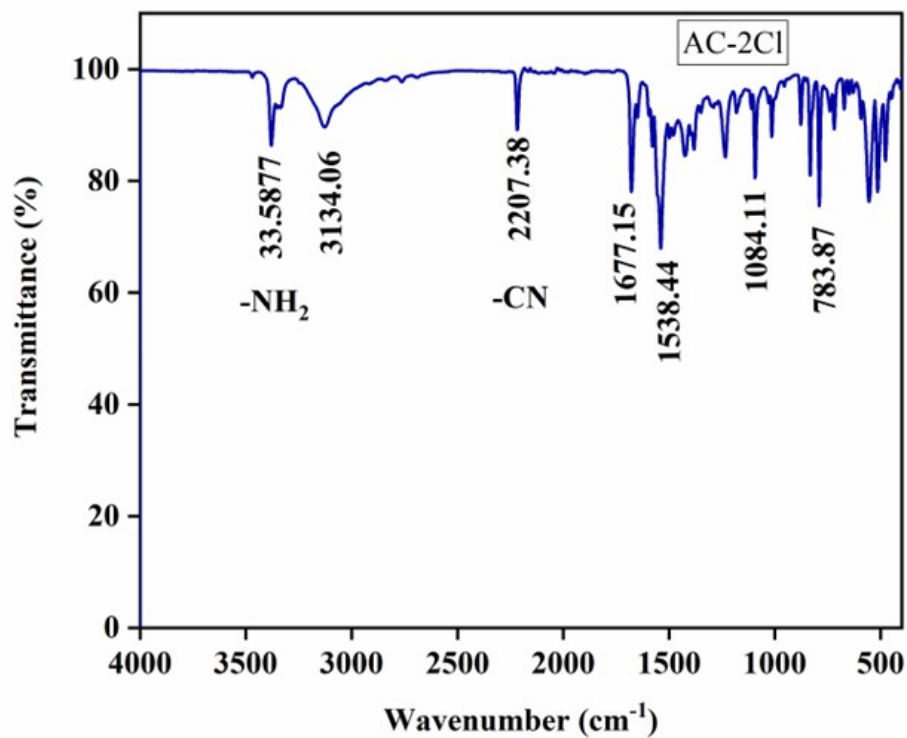

Figure S14. FT-IR spectrum of 4-amino-6-(2-chlorophenyl)-2-methylpyrimidine-5-carbonitrile (4C)

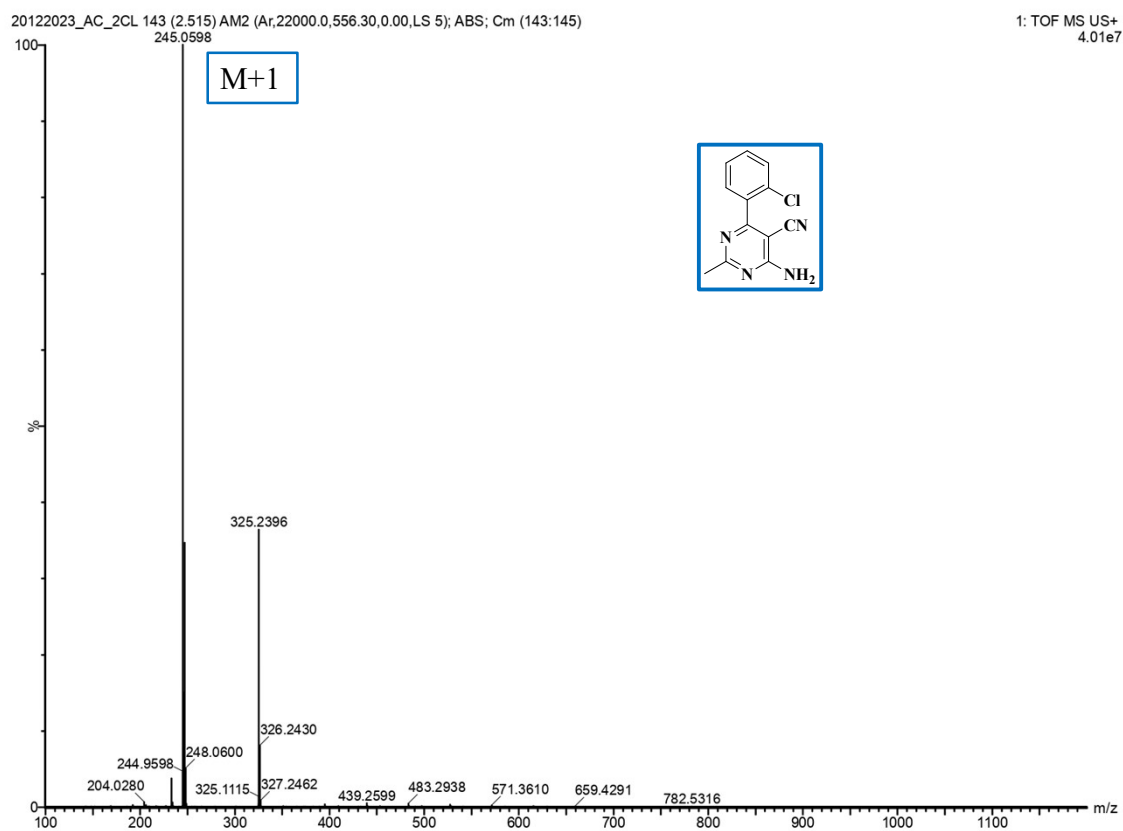

Figure S15. <sup>1</sup>H NMR spectrum of 4-amino-6-(2-chlorophenyl)-2-methylpyrimidine-5-carbonitrile (4C)

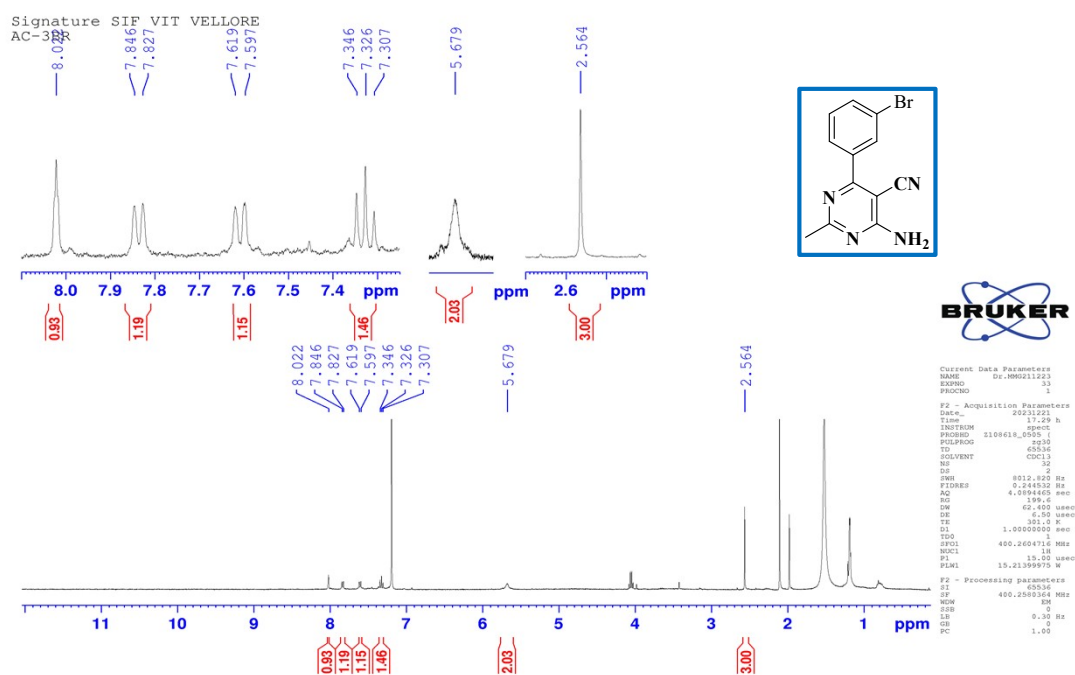

Figure S16.  $^1\text{H}$  NMR spectrum of 4-amino-6-(3-bromophenyl)-2-methylpyrimidine-5-carbonitrile (4d)

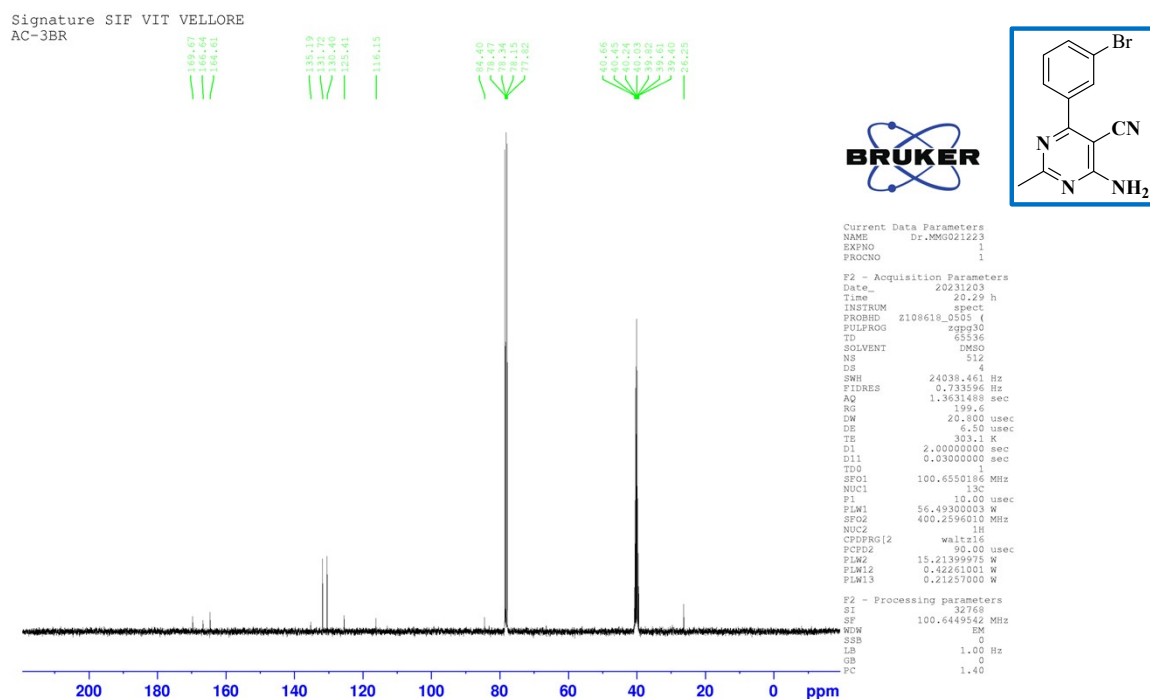

Figure S17.  $^{13}\text{C}$  NMR spectrum of 4-amino-6-(3-bromophenyl)-2-methylpyrimidine-5-carbonitrile (4d)

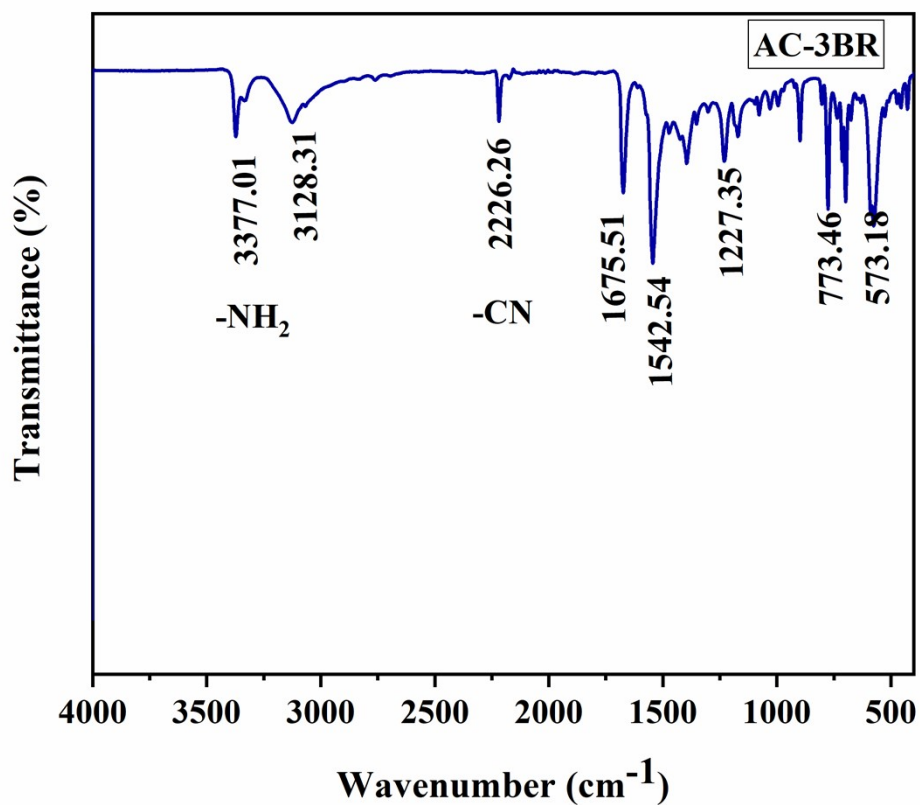

Figure S18. FT-IR spectrum of 4-amino-6-(3-bromophenyl)-2-methylpyrimidine-5-carbonitrile (4d)

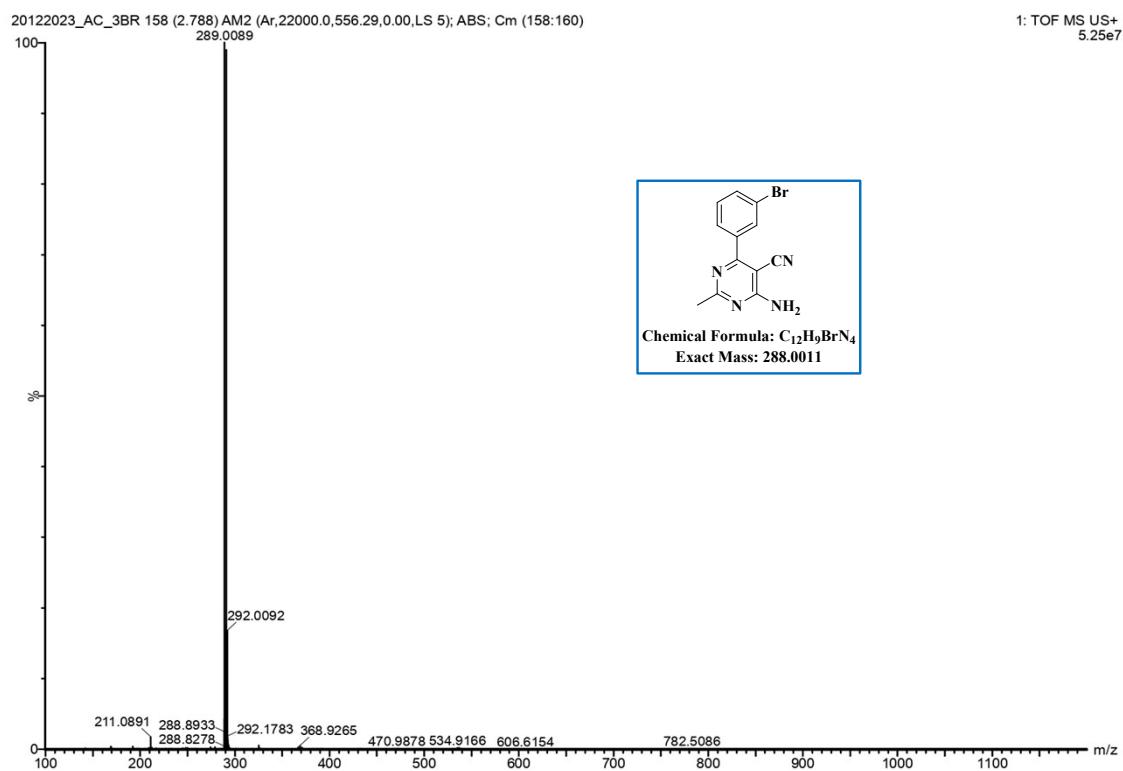

Figure S19. HR-MS spectrum of 4-amino-6-(3-bromophenyl)-2-methylpyrimidine-5-carbonitrile (4d)



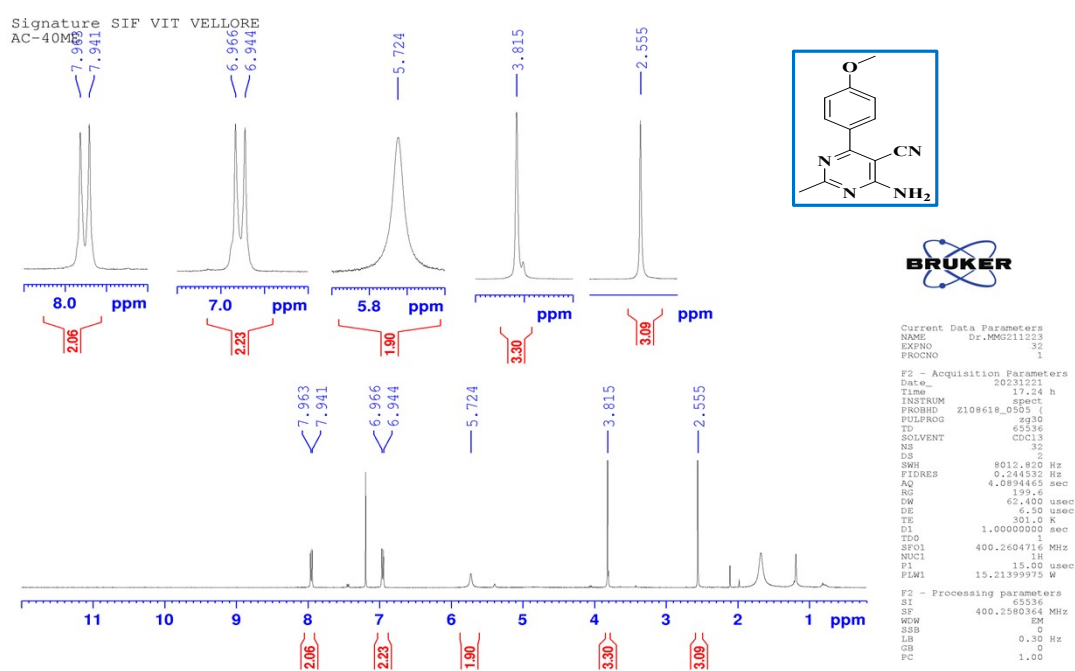

Figure S20.  $^1\text{H}$  NMR spectrum of 4-amino-6-(4-methoxyphenyl)-2-methylpyrimidine-5-carbonitrile (4e)

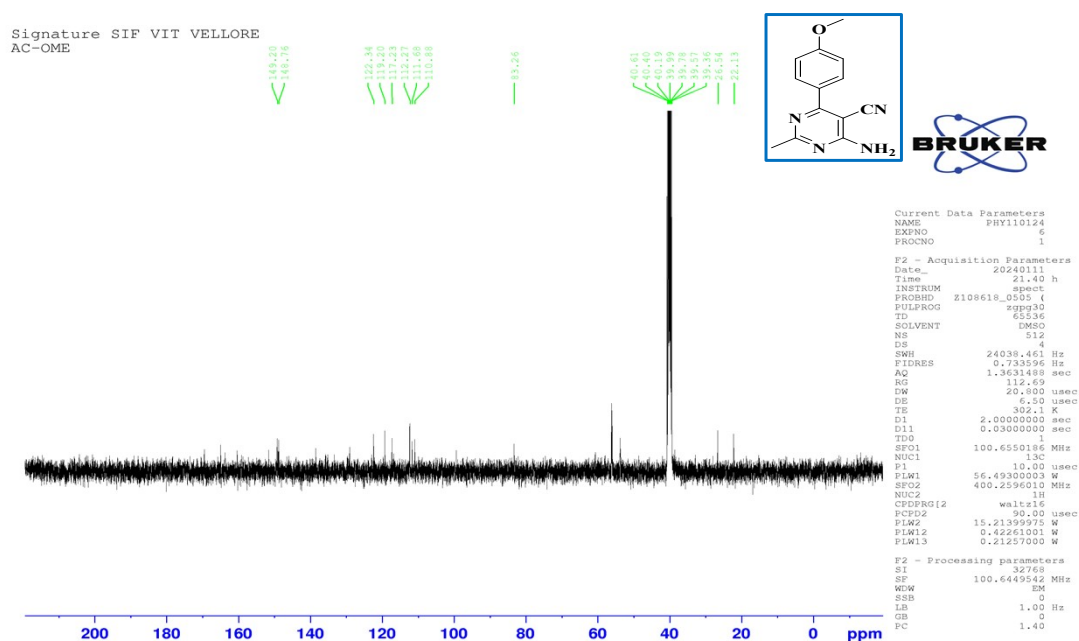

Figure S21.  $^{13}\text{C}$  NMR spectrum of 4-amino-6-(4-methoxyphenyl)-2-methylpyrimidine-5-carbonitrile (4e)

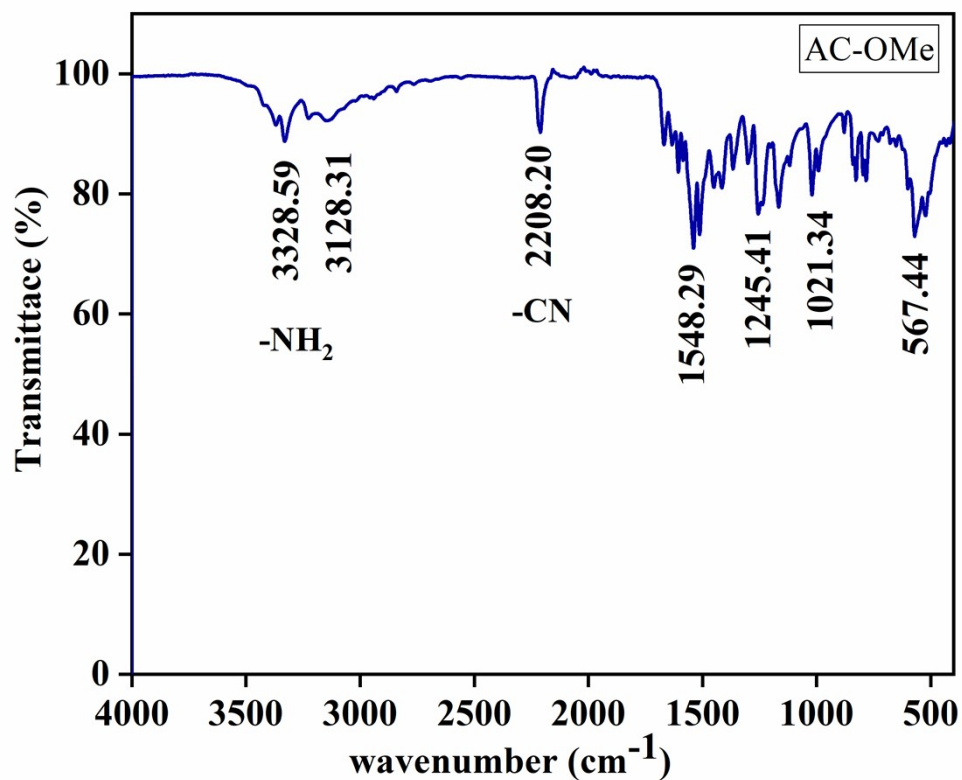

Figure S22. FT-IR spectrum of 4-amino-6-(4-methoxyphenyl)-2-methylpyrimidine-5-carbonitrile (4e)

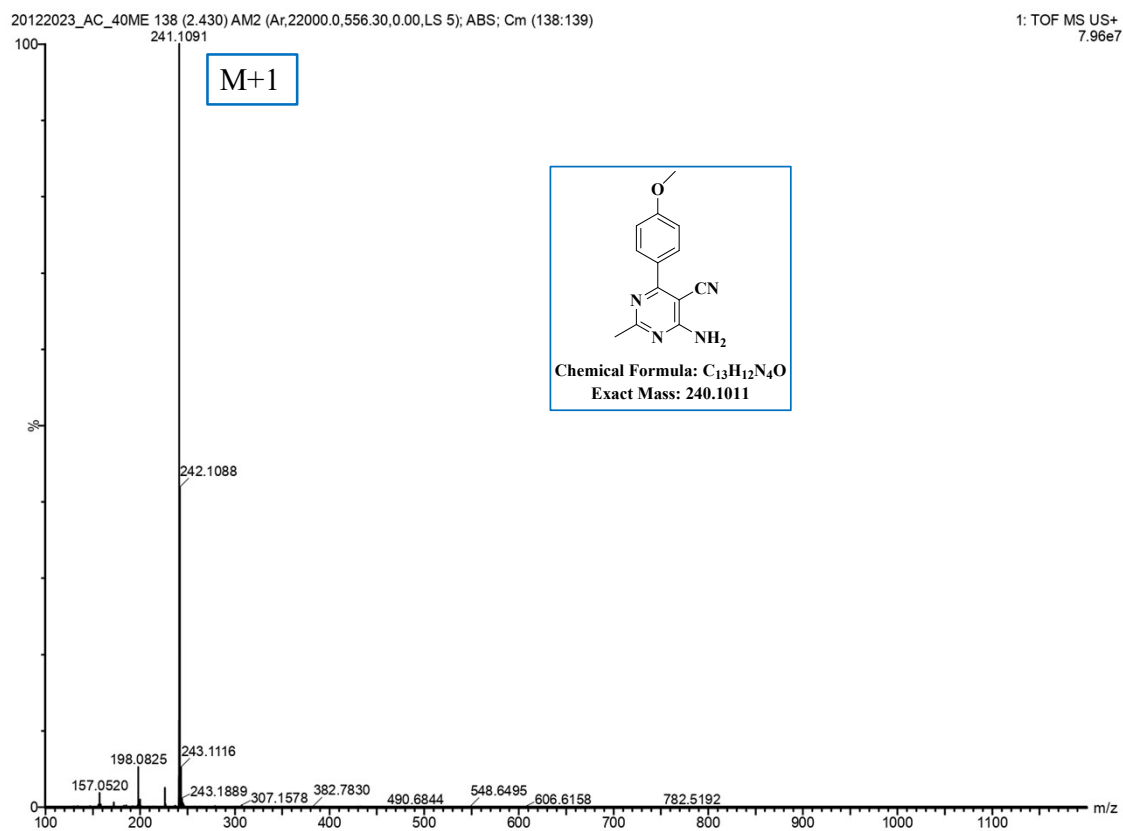

Figure S23. HR-MS spectrum of 4-amino-6-(4-methoxyphenyl)-2-methylpyrimidine-5-carbonitrile (4e)

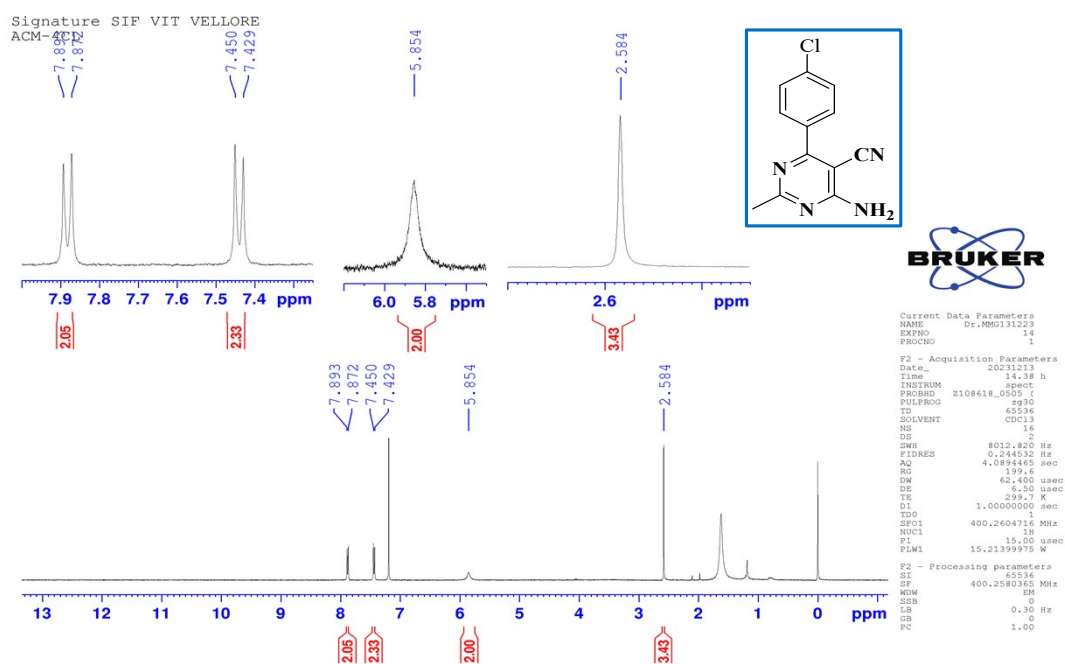

**Figure S24.**  $^1\text{H}$  NMR spectrum of 4-amino-6-(4-chlorophenyl)-2-methylpyrimidine-5-carbonitrile (4f)

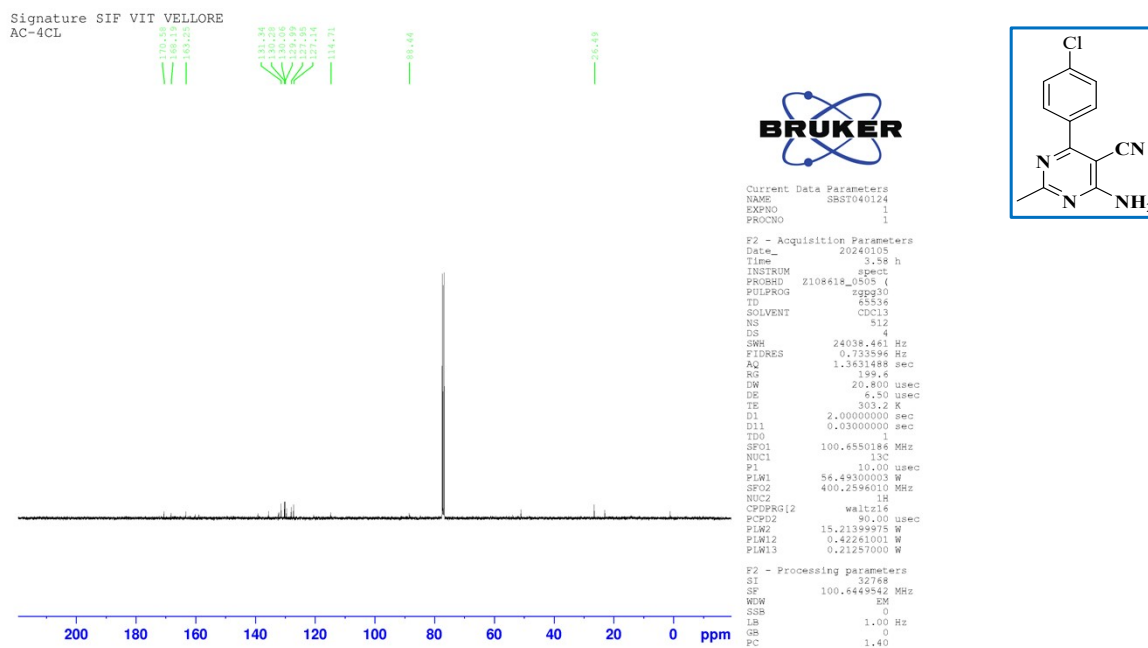

**Figure S25.**  $^{13}\text{C}$  spectrum of 4-amino-6-(4-chlorophenyl)-2-methylpyrimidine-5-carbonitrile (4f)

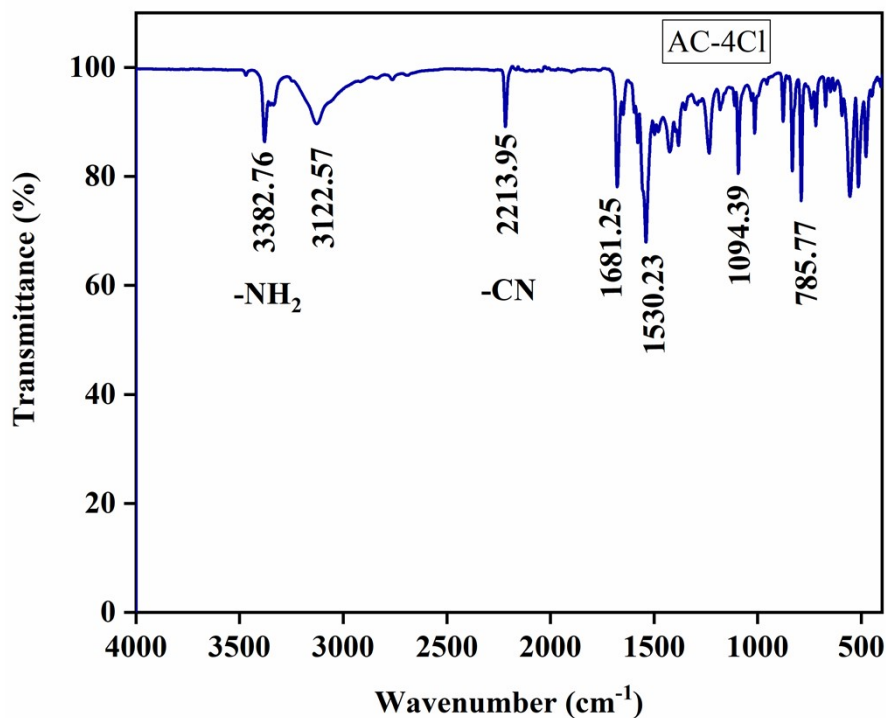

**Figure S26.** FT-IR spectrum of 4-amino-6-(4-chlorophenyl)-2-methylpyrimidine-5-carbonitrile (4f)

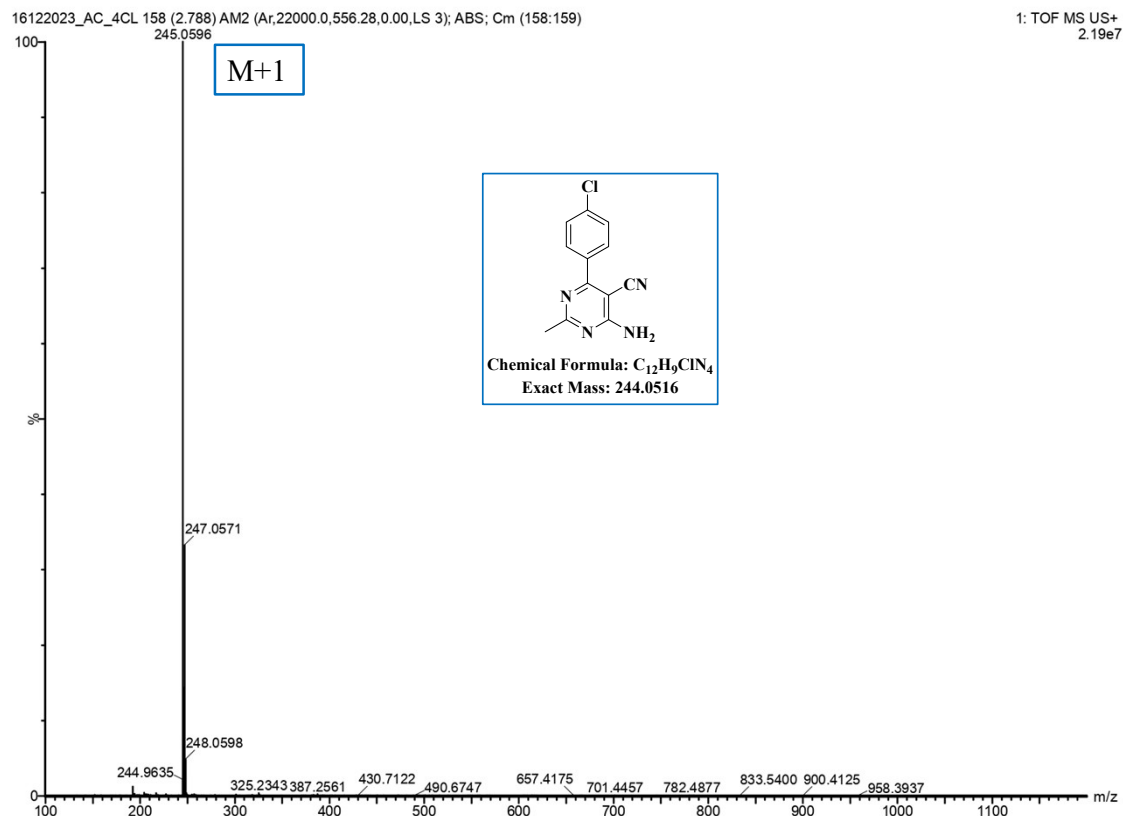

**Figure S27.** HR-MS spectrum of 4-amino-6-(4-chlorophenyl)-2-methylpyrimidine-5-carbonitrile (4f)

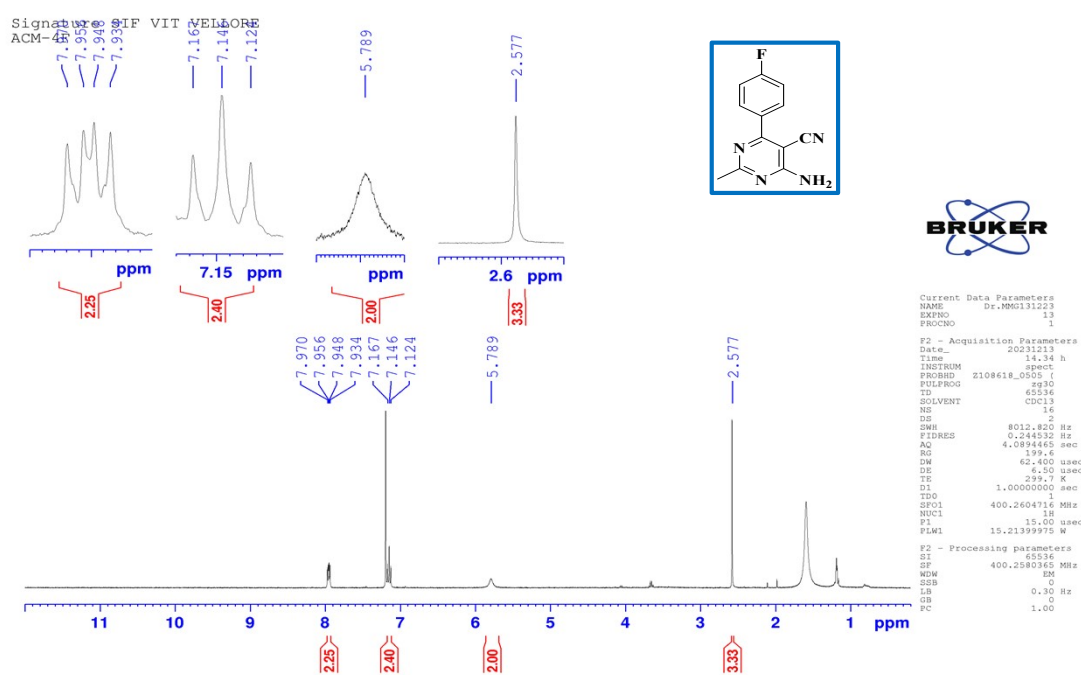

Figure S28. <sup>1</sup>H NMR spectrum of 4-amino-6-(4-Fluorophenyl)-2-methylpyrimidine-5-carbonitrile (4g)

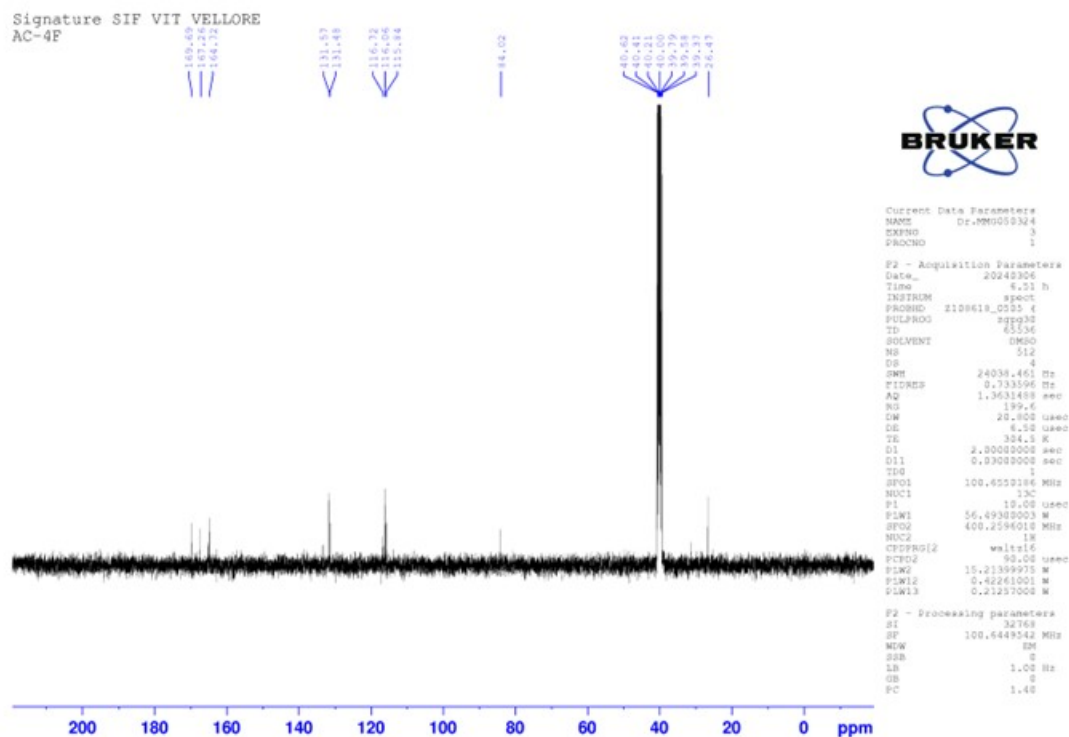

Figure S29. <sup>13</sup>C NMR spectrum of 4-amino-6-(4-Fluorophenyl)-2-methylpyrimidine-5-carbonitrile (4g)

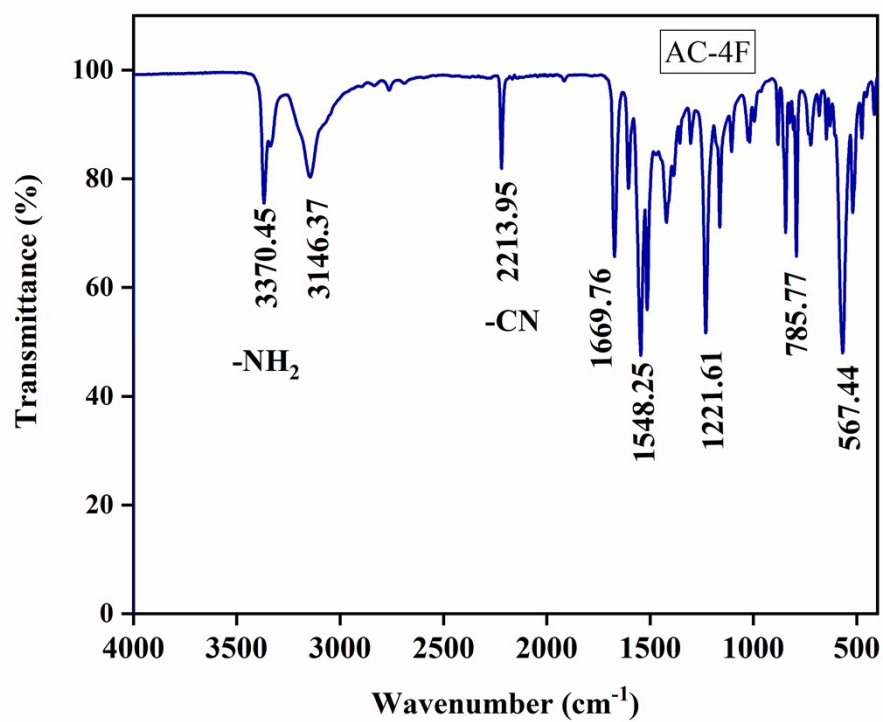

**Figure S30.** FT-IR spectrum of 4-amino-6-(4-Fluorophenyl)-2-methylpyrimidine-5-carbonitrile (4g)

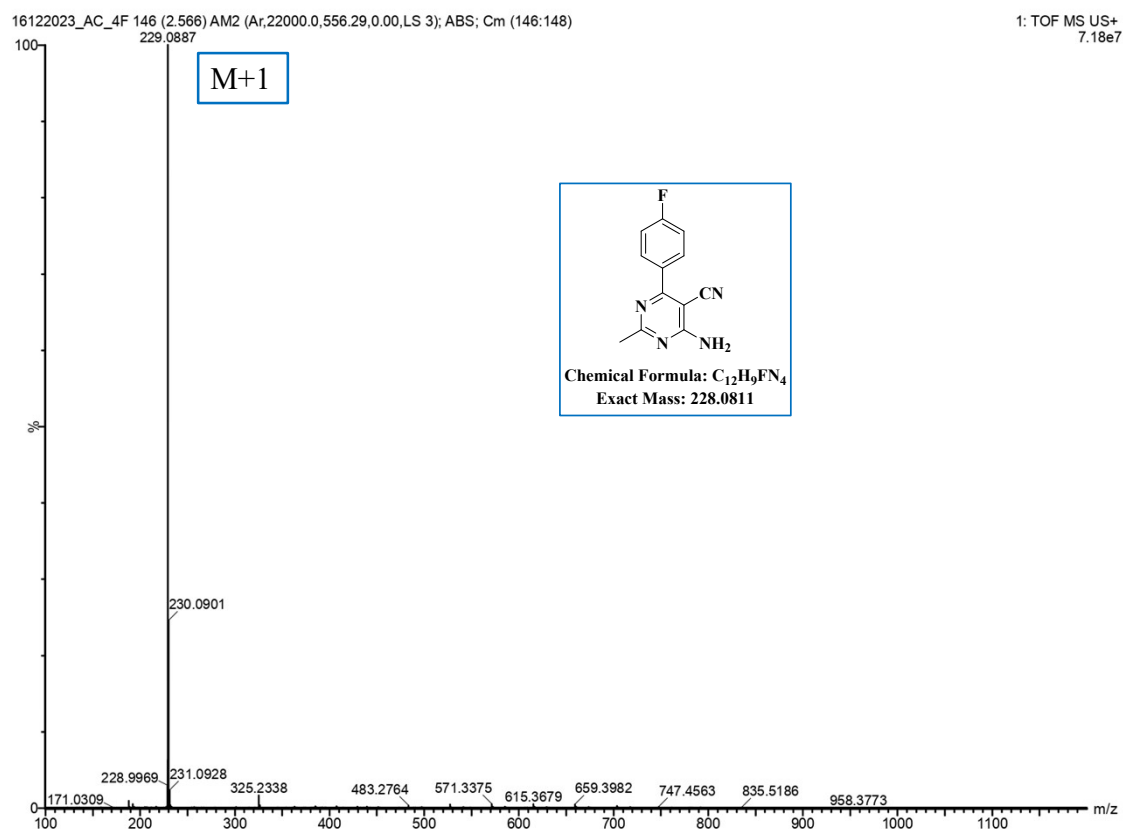

**Figure S31.** HR-MS spectrum of 4-amino-6-(4-Fluorophenyl)-2-methylpyrimidine-5-carbonitrile (4g)

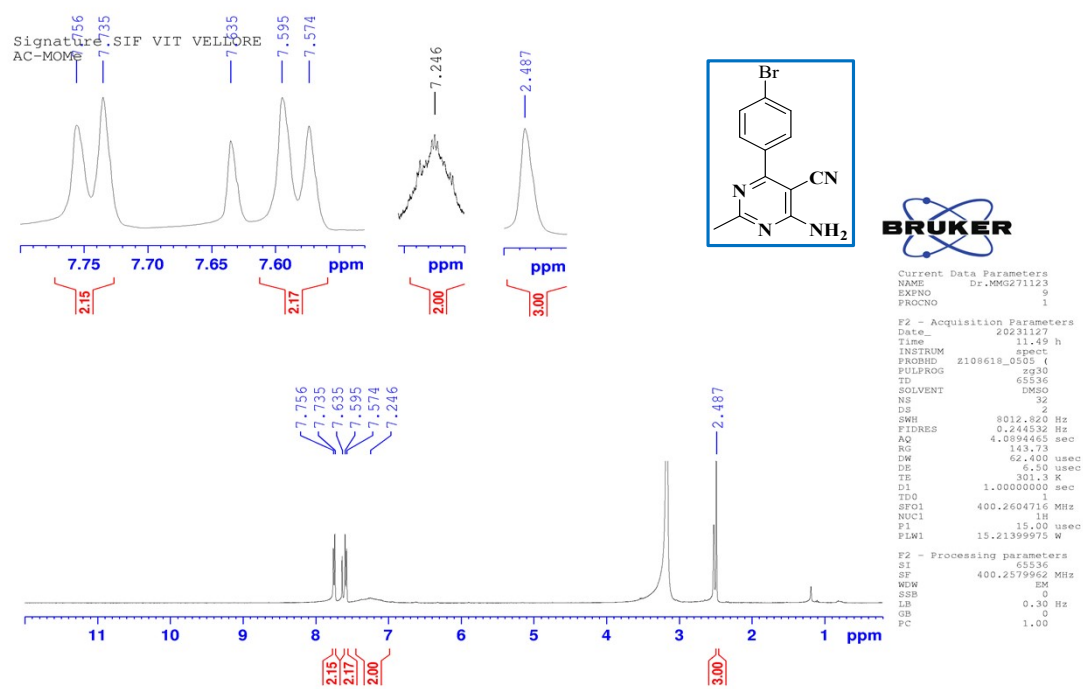

**Figure S32.**  $^1\text{H}$  NMR spectrum of 4-amino-6-(4-bromophenyl)-2-methylpyrimidine-5-carbonitrile (4h)

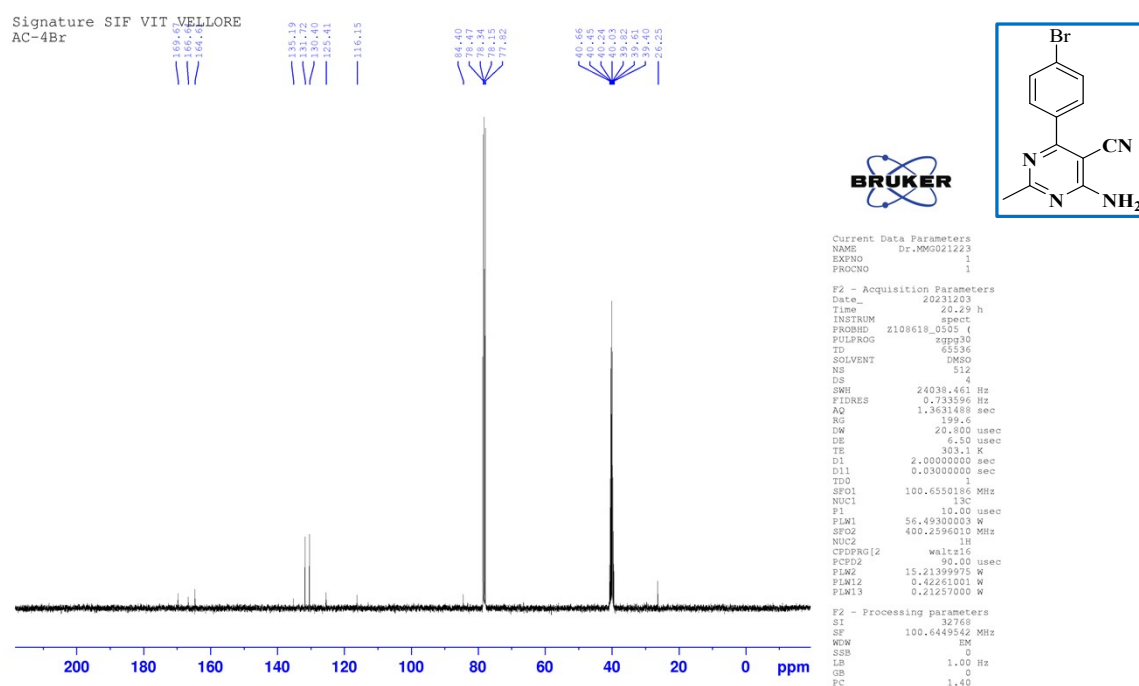

**Figure S33.**  $^{13}\text{C}$  NMR spectrum of 4-amino-6-(4-bromophenyl)-2-methylpyrimidine-5-carbonitrile (4h)

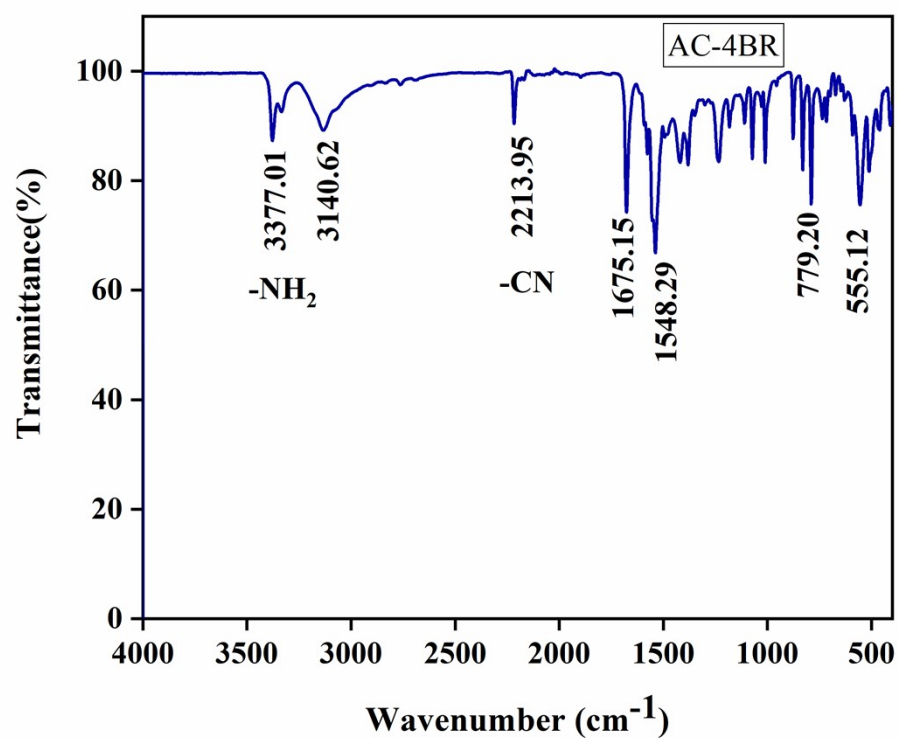

**Figure S34.** FT-IR spectrum of 4-amino-6-(4-bromophenyl)-2-methylpyrimidine-5-carbonitrile (4h)



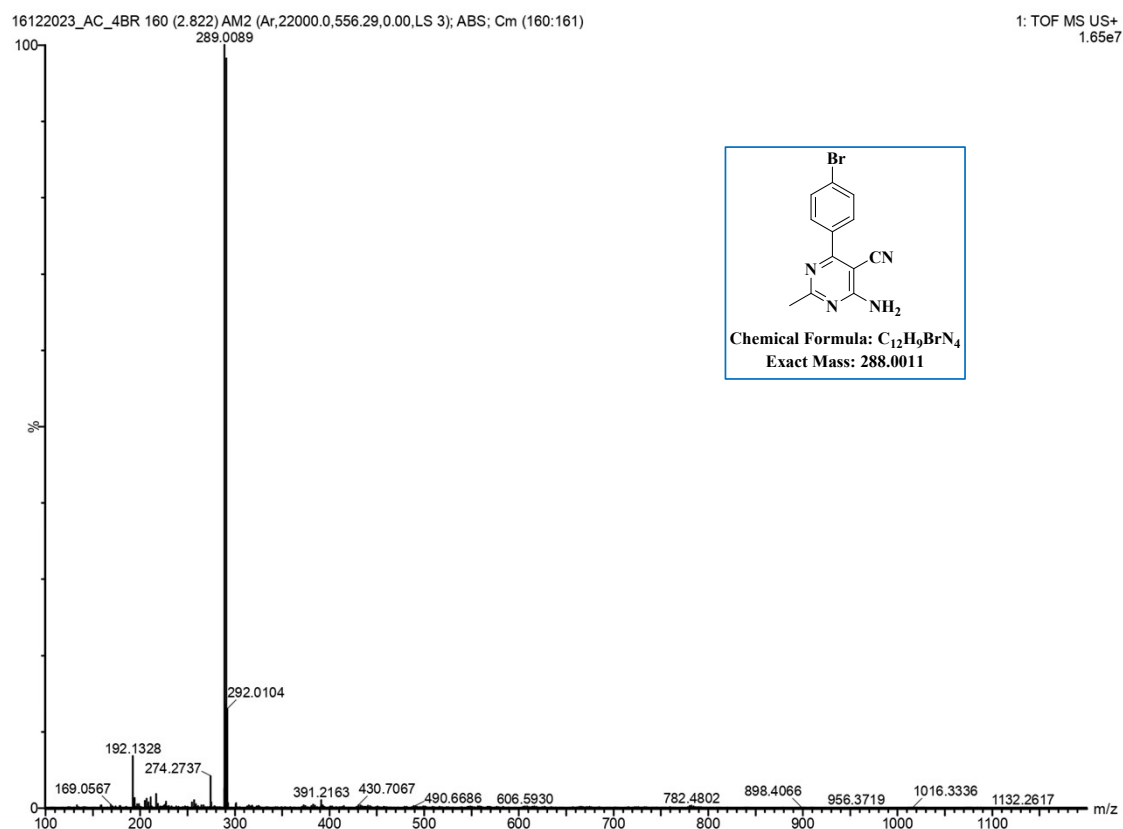

Figure S35. HR-MS spectrum of 4-amino-6-(4-bromophenyl)-2-methylpyrimidine-5-carbonitrile (4h)

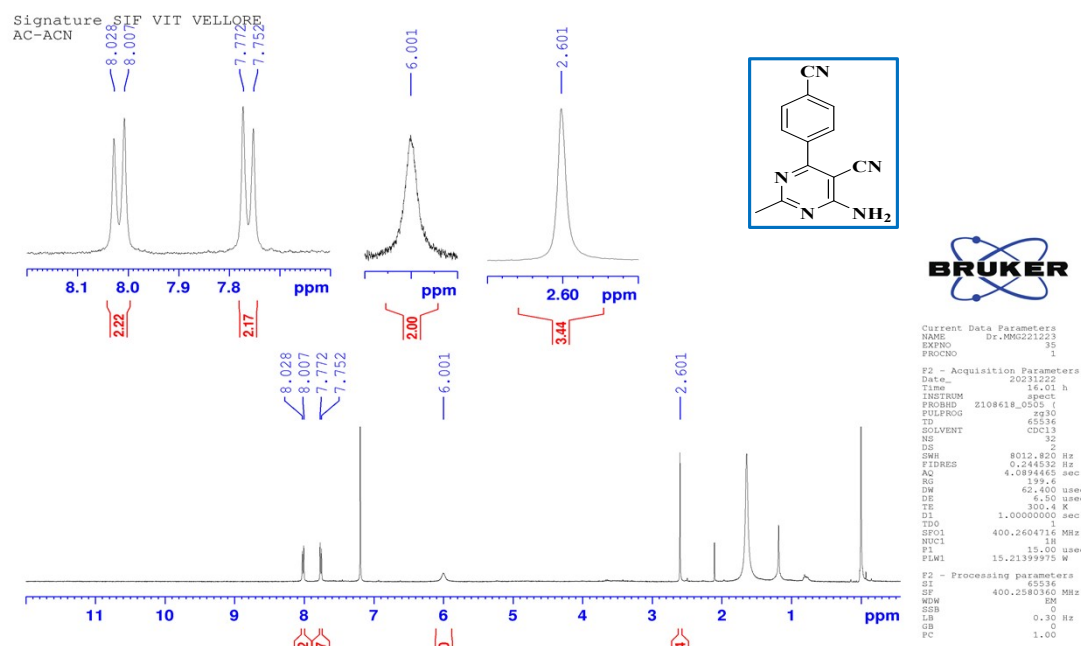

Figure S36. <sup>1</sup>H NMR spectrum of 4-amino-6-(4-cyanophenyl)-2-methylpyrimidine-5-carbonitrile (4i)

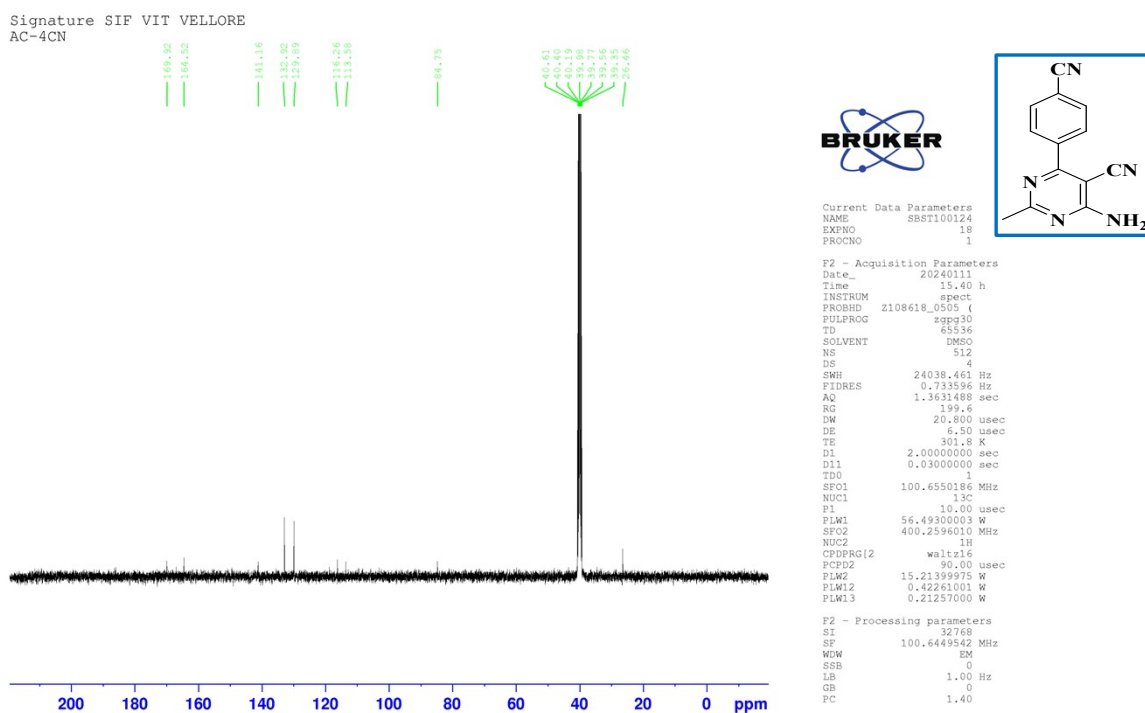

Figure S37.  $^{13}\text{C}$  NMR spectrum of 4-amino-6-(4-cyanophenyl)-2-methylpyrimidine-5-carbonitrile (4i)

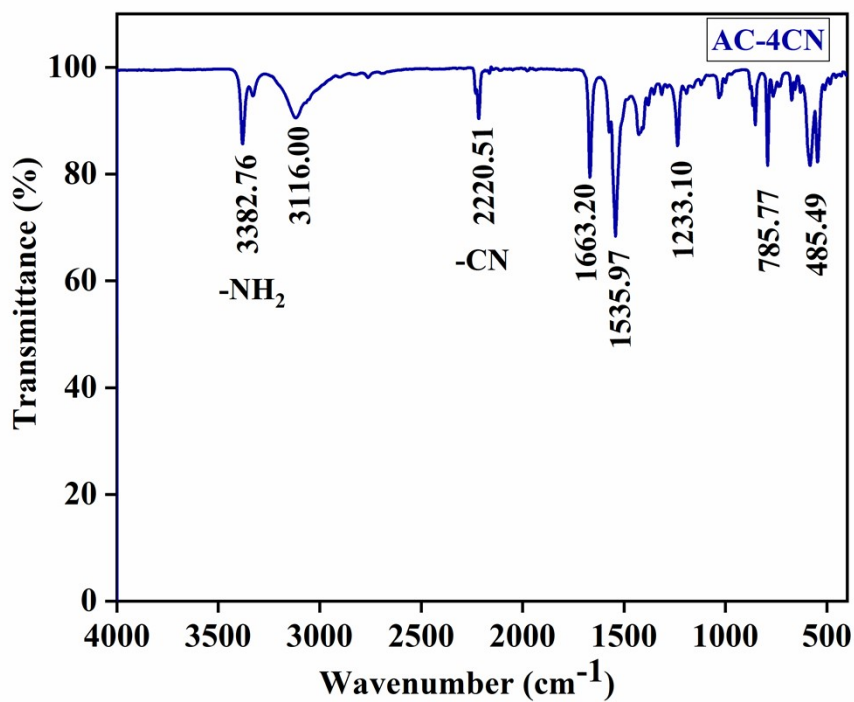

Figure S38. FT-IR spectrum of 4-amino-6-(4-cyanophenyl)-2-methylpyrimidine-5-carbonitrile (4i)

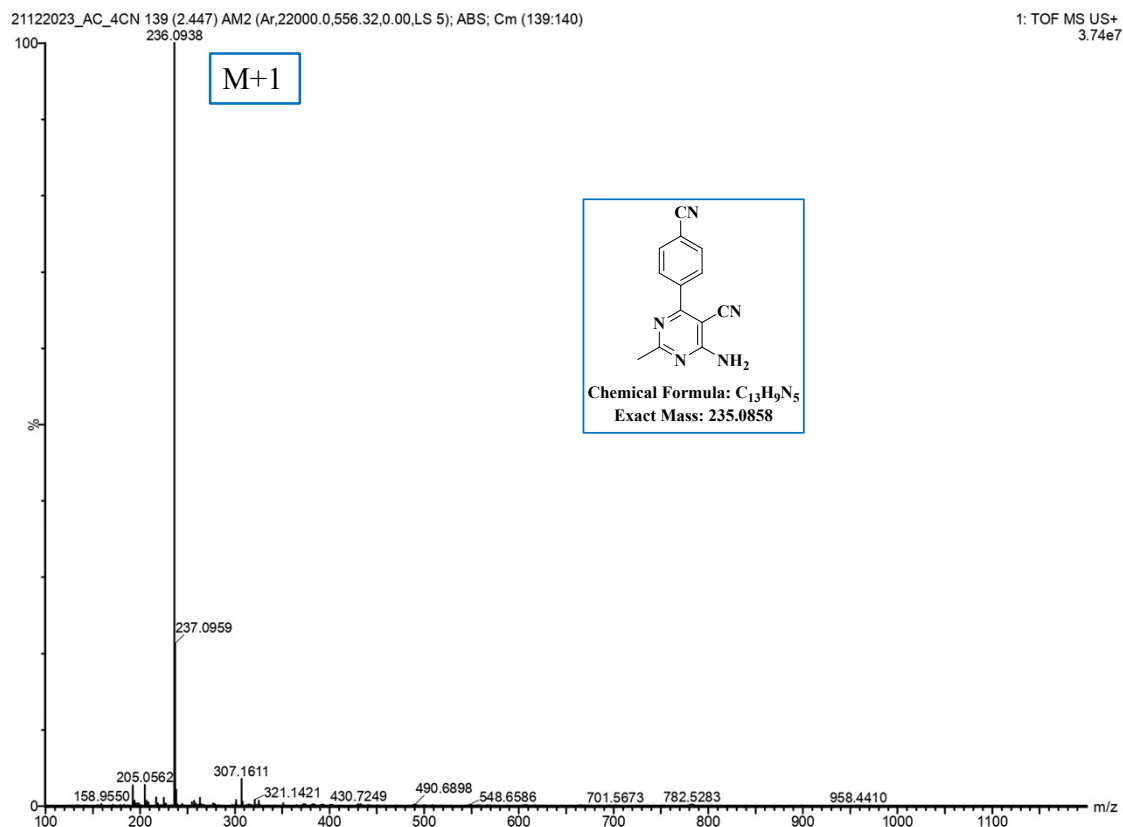

Figure S39. HR-MS spectrum of 4-amino-6-(4-cyanophenyl)-2-methylpyrimidine-5-carbonitrile (4i)

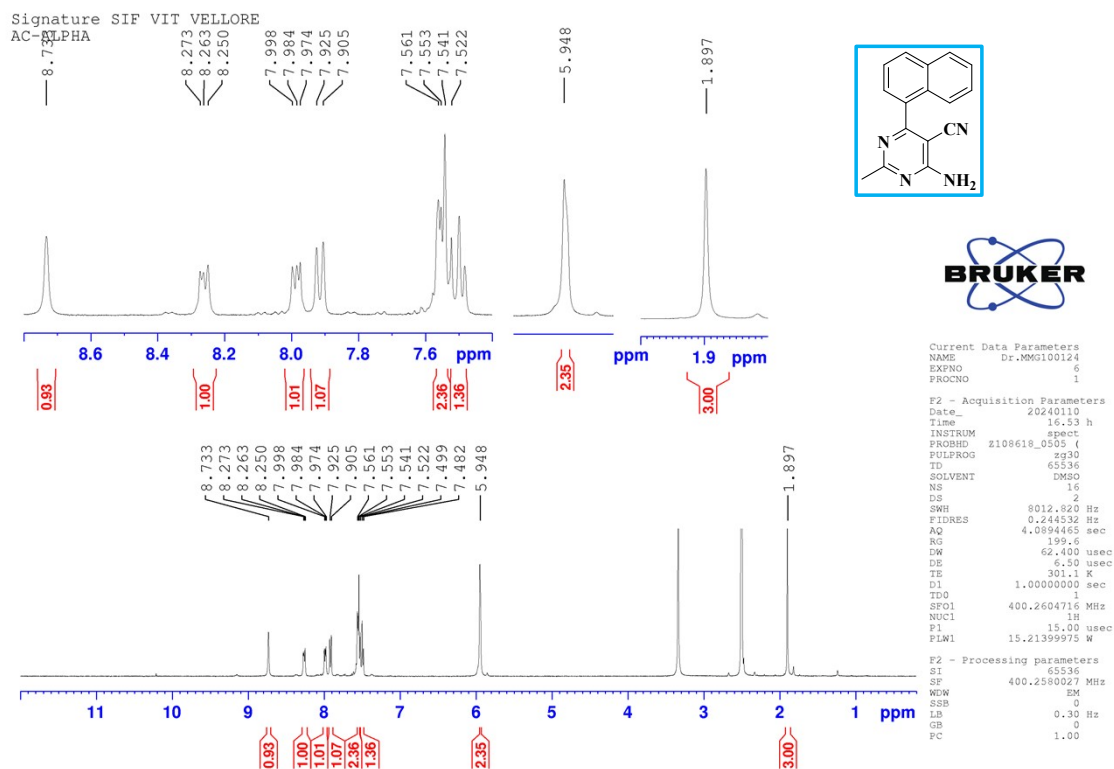

Figure S40.  $^1H$  NMR spectrum of 4-amino-2-methyl-6-(naphthalen-1-yl)pyrimidine-5-carbonitrile (4j)

Signature SIF VIT VELLORE  
AC-alpha

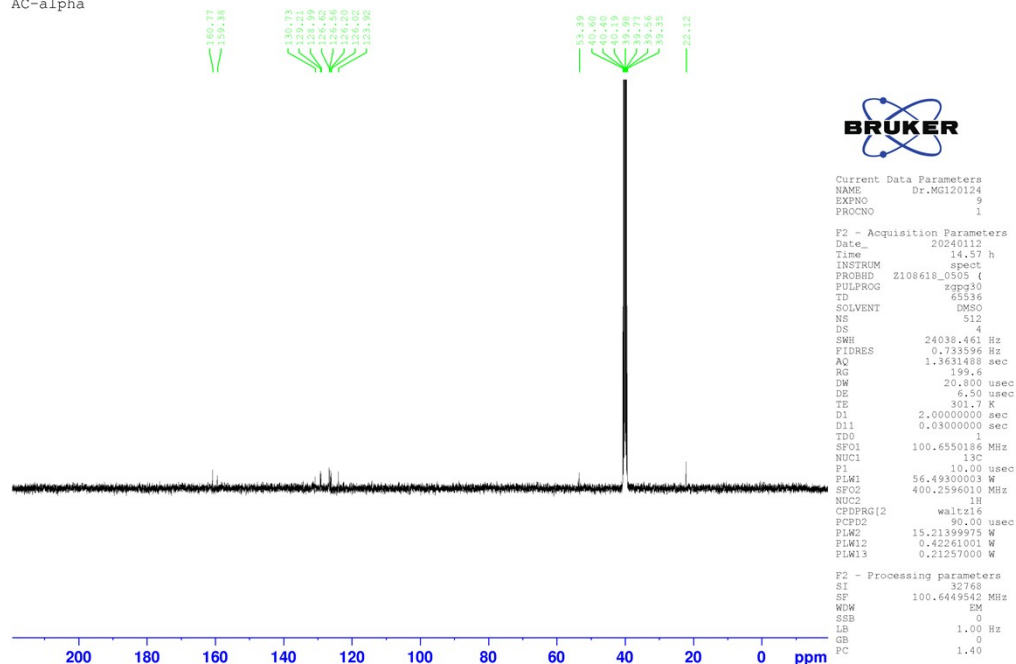

Figure S41.  $^{13}\text{C}$  NMR spectrum of 4-amino-2-methyl-6-(naphthalen-1-yl)pyrimidine-5-carbonitrile (4j)

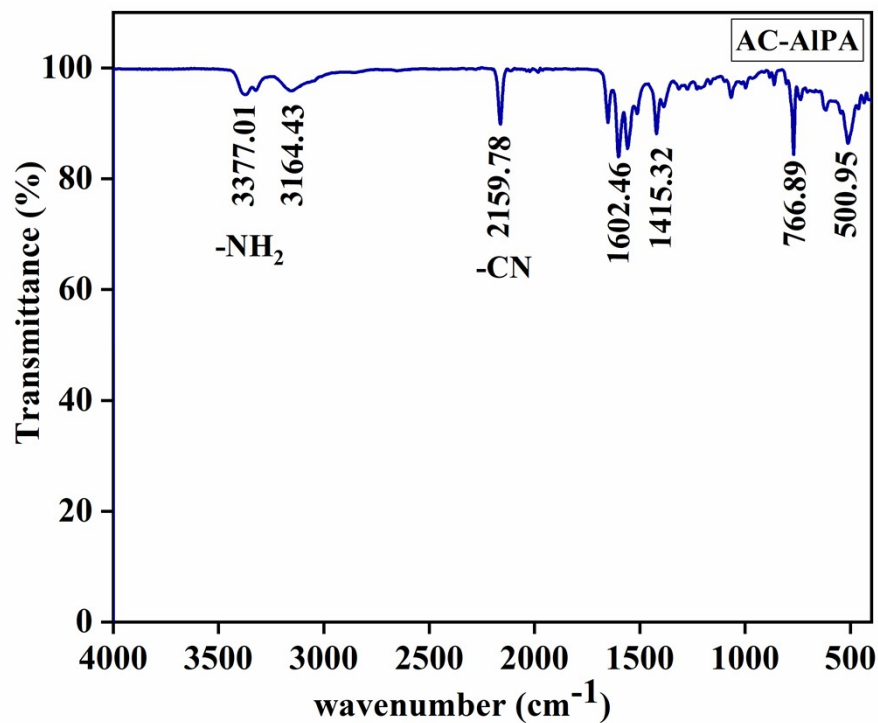

Figure S42. FT-IR spectrum of 4-amino-2-methyl-6-(naphthalen-1-yl)pyrimidine-5-carbonitrile (4j)

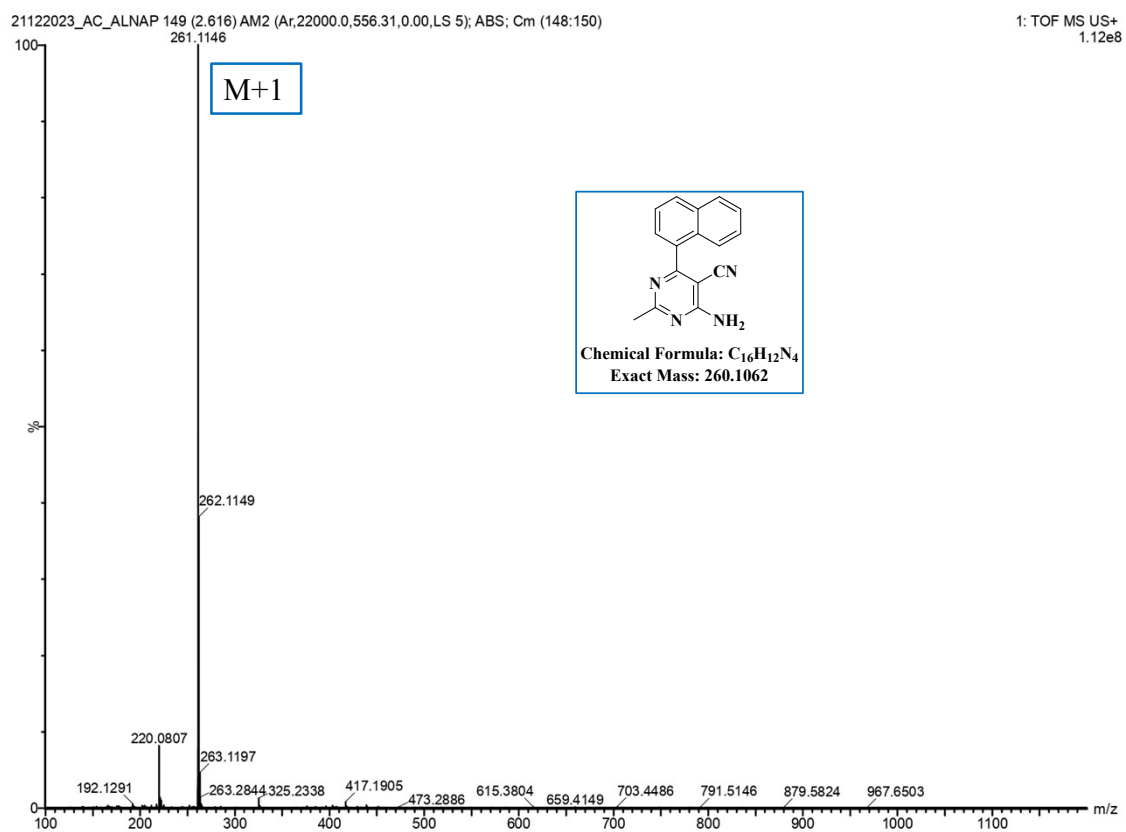

**Figure S43.** HR-MS spectrum of 4-amino-2-methyl-6-(naphthalen-1-yl)pyrimidine-5-carbonitrile (4j)

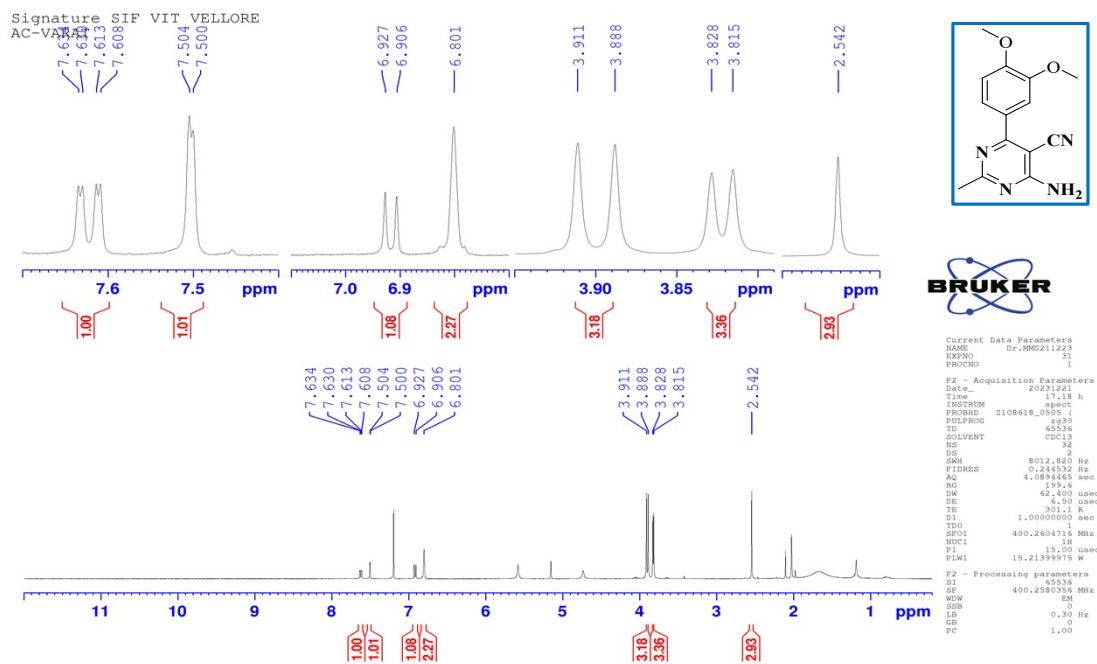

**Figure S44.** <sup>1</sup>H NMR spectrum of 4-amino-6-(3,4-dimethoxyphenyl)-2-methylpyrimidine-5-carbonitrile (4k)

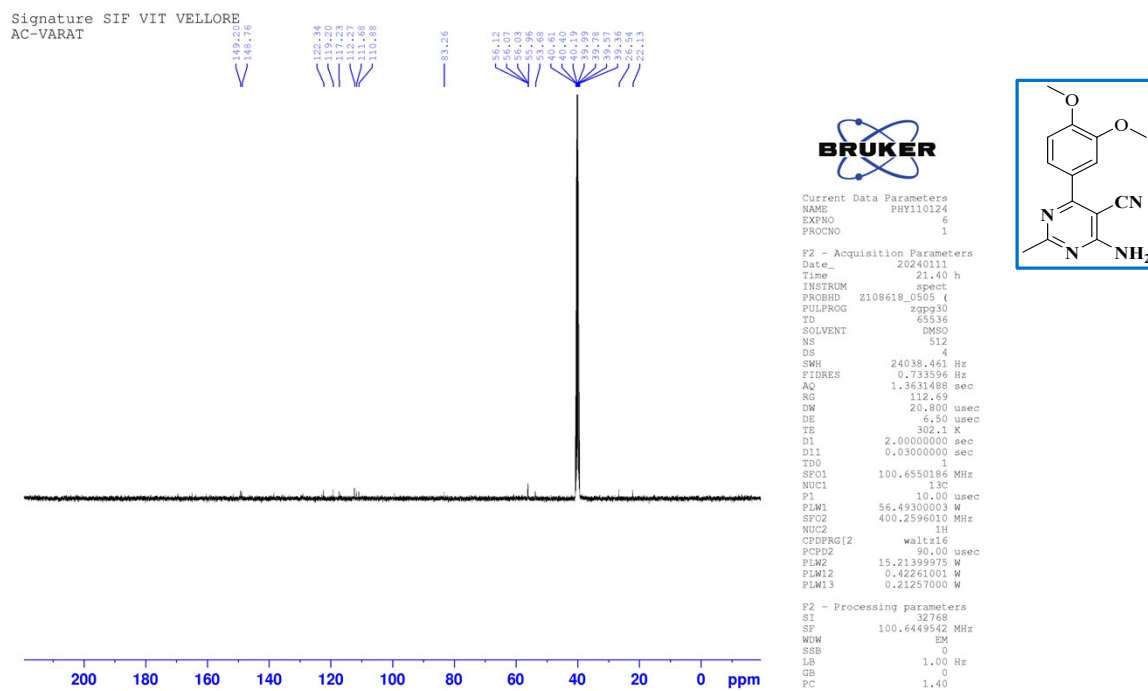

**Figure S45.**  $^{13}\text{C}$  NMR spectrum of 4-amino-6-(3,4-dimethoxyphenyl)-2-methylpyrimidine-5-carbonitrile (4k)

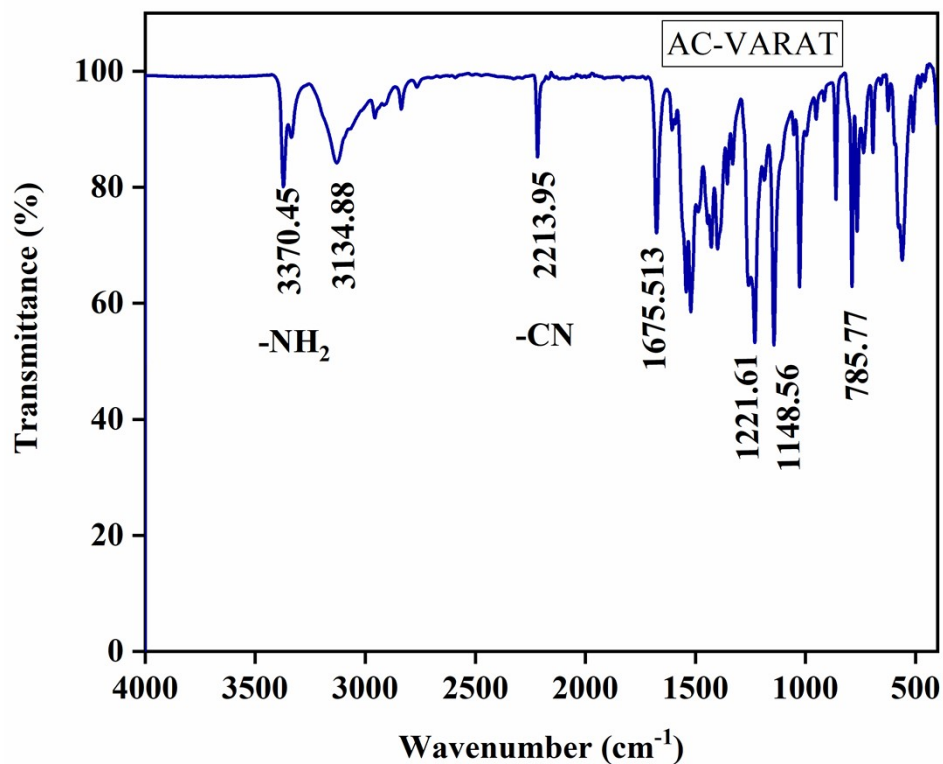

**Figure S46.** FT-IR spectrum of 4-amino-6-(3,4-dimethoxyphenyl)-2-methylpyrimidine-5-carbonitrile (4k)

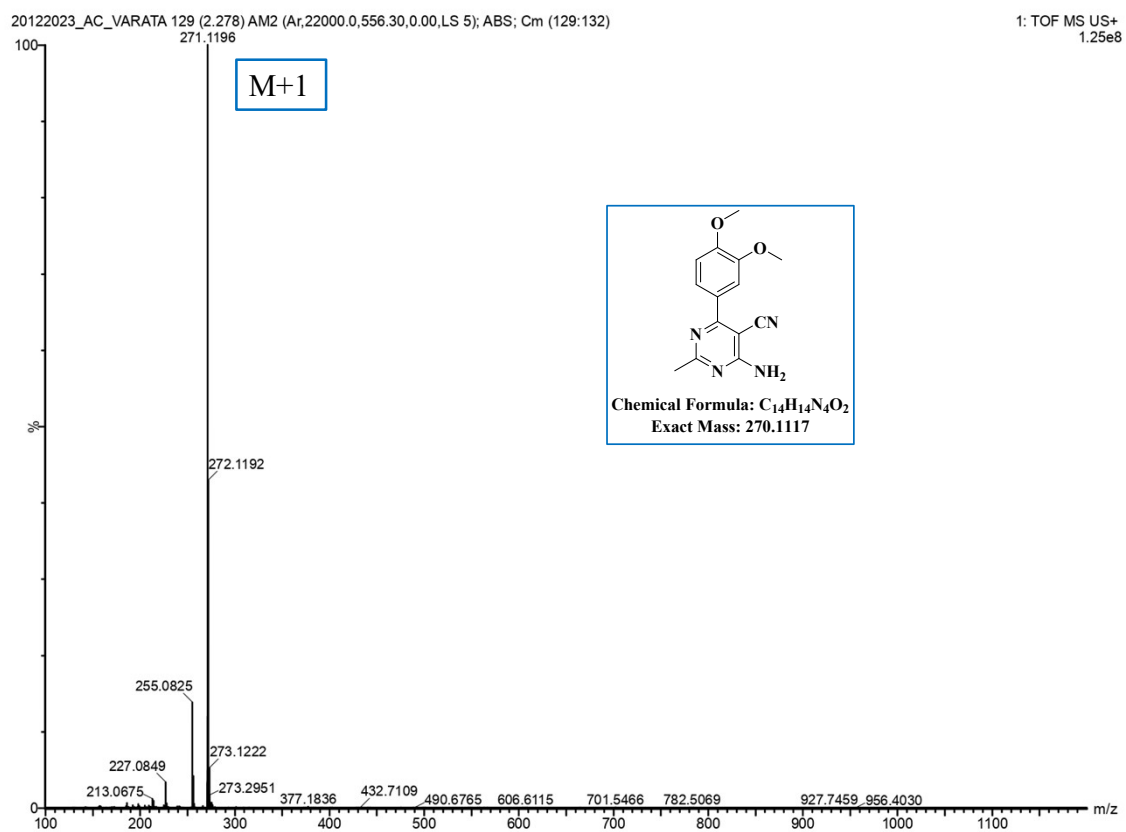

**Figure S47.** HR-MS spectrum of 4-amino-6-(3,4-dimethoxyphenyl)-2-methylpyrimidine-5-carbonitrile (4k)
